1 **Factors Driving Unique Urination Phenotypes of Male and Female 9-week-old C57BL/6J**  
2 **Mice**

3 Hannah Ruetten<sup>1,2</sup>, Kyle A. Wegner<sup>2,3</sup>, Helen L. Zhang<sup>1,2</sup>, Peiqing Wang<sup>1,2,4</sup>, Jaskiran Sandhu<sup>1,2</sup>,  
4 Simran Sandhu<sup>1,2</sup>, Brett Mueller<sup>1,2</sup>, Zunyi Wang<sup>2,4</sup>, Jill Macoska<sup>2,4</sup>, Richard E. Peterson<sup>5</sup>, Dale  
5 E. Bjorling<sup>2,6</sup>, William A. Ricke<sup>2,3,7</sup>, Paul C. Marker<sup>2,4</sup>, and Chad M. Vezina<sup>1,2,3</sup>.

6 <sup>1</sup>Department of Comparative Biosciences, University of Wisconsin-Madison, Madison, WI

7 <sup>2</sup>University of Wisconsin-Madison/UMASS Boston George M. O'Brien Center for Benign  
8 Urologic Research, Madison, WI and Boston, MA

9 <sup>3</sup>Molecular and Environmental Toxicology Center, University of Wisconsin-Madison, Madison,  
10 WI

11 <sup>4</sup>Center for Personalized Cancer Therapy, the University of Massachusetts Boston, Boston,  
12 Massachusetts.

13 <sup>6</sup>Department of Surgical Sciences, University of Wisconsin-Madison, Madison, WI

14 <sup>7</sup>Department of Urology, University of Wisconsin-Madison, Madison, WI

15 <sup>5</sup>Division of Pharmaceutical Sciences, University of Wisconsin-Madison, Madison, WI

16 **CORRESPONDENCE:**

17 Chad M. Vezina

18 Dept. of Comparative Biosciences

19 University of Wisconsin – Madison

20 1656 Linden Dr,

21 Madison, WI 53706

22 chad.vezina@wisc.edu

23 **ABBREVIATED TITLE: Sex Differences in Urinary Physiology of C57BL/6J Mice**

24 **ABSTRACT (250 word limit)**

25 Laboratory mice are used to identify causes of urinary dysfunction including prostate-  
26 related mechanisms of Lower Urinary Tract Symptoms (LUTS). Effective use of mice for this

27 purpose requires a clear understanding of molecular, cellular, anatomical, and endocrine  
28 contributions to voiding function. Whether the prostate influences baseline voiding function has  
29 not been specifically evaluated, in part because most methods that alter prostate mass also  
30 change circulating testosterone concentrations. We performed void spot assay and cystometry  
31 to establish a multi-parameter “baseline” of voiding function in intact male and female 9-week-  
32 old (adult) C57BL/6J mice. We then compared voiding function in intact male mice to that of  
33 castrate males, males (and females) treated with the steroid five alpha reductase inhibitor  
34 finasteride, or males harboring alleles (*Pbsn4<sup>cre/+</sup>;R26R<sup>Dta/+</sup>*) that significantly reduce prostate  
35 lobe mass by depleting prostatic luminal epithelial cells. We evaluated aging-related changes in  
36 male urinary voiding. We also treated intact male, castrate male, and female mice with  
37 exogenous testosterone to determine the influence of androgen on voiding function. The three  
38 methods used to reduce prostate mass (castration, finasteride, *Pbsn4<sup>cre/+</sup>; R26R<sup>Dta/+</sup>*) changed  
39 voiding function from baseline but in a nonuniform manner. Castration feminized some aspects  
40 of male urinary physiology (making them more like intact female) while exogenous testosterone  
41 masculinized some aspects of female urinary physiology (making them more like intact male).  
42 Our results provide evidence that circulating testosterone is responsible in part for baseline sex  
43 differences in C57BL/6J mouse voiding function while prostate lobe mass in young, healthy  
44 adult mice has a lesser influence.

45 **KEY WORDS (3 to 5):** LUTS, Void Spot Assay, Cystometry, BPH, Animal Model

46  
47

## 48 1. INTRODUCTION

49 Lower urinary tract symptoms (LUTS) are prevalent in adult men and women, negatively  
50 affect quality of life, and associate with depression.<sup>1, 2</sup> It was once believed that LUTS in aging  
51 men derive almost exclusively from prostatic enlargement and urethral occlusion.<sup>3</sup> The rationale  
52 was that prostatic volume<sup>4</sup> and LUTS prevalence and severity<sup>5, 6</sup> increase with age, and that  
53 prostate resection generally alleviates LUTS in aging males.<sup>7</sup> Recent studies suggest a disease  
54 process more complex than previously appreciated. Prostatic volume does not strongly  
55 correlate with urodynamic patterns or LUTS severity when measured in the same cohort of  
56 men.<sup>5, 8</sup> Some men with above average prostate volume do not experience clinically significant  
57 LUTS while others with below average prostate volumes experience severe LUTS.<sup>9, 10</sup> It is now  
58 becoming clear that male LUTS arise from multiple mechanisms in addition to prostatic  
59 enlargement.<sup>11</sup> There is growing support for the roles of prostatic urethral collagen  
60 accumulation,<sup>12</sup> inflammation,<sup>13</sup> and smooth muscle hypercontractility<sup>14, 15</sup> in progressive  
61 LUTS. There is also a growing need for validated model systems to rigorously test these new  
62 mechanisms and new pharmacological interventions.

63 The use of mice to study urinary voiding dysfunction is extensive and widespread. A search  
64 of the term “Urology” in PubMed revealed 17,815 publications in 2018: 27 were studies in dog,  
65 575 in rat, and 1003 in mouse. The practice of using male mice for human urinary voiding  
66 translational studies has been controversial because not all aspects of mouse and human  
67 prostate anatomy are the same. Similarities include anatomical location (base of the bladder)  
68 and a narrowing of the urethra in the region where prostatic ducts drain (prostatic urethra).  
69 Major differences include prostatic encapsulation and compaction. A portion of the mouse  
70 prostate gland lies within a muscular sphincter (rhabdosphinter) but the majority of prostate  
71 tissue branches into four bilaterally symmetrical prostate lobes (anterior, dorsal, lateral, and  
72 ventral) that are not encapsulated.<sup>16, 17</sup> The human prostate gland, in contrast, is spherical and  
73 has a fibromuscular capsule.<sup>18</sup> Several studies demonstrate a clear influence of prostate

74 pathologies on mouse urinary voiding behaviors.<sup>19-22</sup> Influence of the mouse prostate on  
75 baseline voiding function has not been specifically evaluated, in part because many methods to  
76 alter prostate mass also alter circulating testosterone concentrations.

77 To address these issues, we used multiple experimental groups and contemporary  
78 methods to determine the influence of androgens and prostatic mass on baseline voiding  
79 function, lower urinary tract anatomy, and histology. Our companion publication focuses on  
80 histology. This report exclusively discusses anatomy and physiology and provides an expansive  
81 urinary physiology data set in wild-type C57BL/6J mice that can be mined for hypothesis  
82 generation and validation (Tables 2-10). We first evaluated baseline voiding function in nine-  
83 week-old male and female C57BL/6J control mice. We then used three different approaches to  
84 reduce prostatic mass in male mice: surgical castration, treatment with a steroid 5 alpha  
85 reductase inhibitor (finasteride), and a genetic approach to ablate prostate luminal epithelial  
86 cells. We also treated intact male, castrate male, and female mice with testosterone to control  
87 for the influence of androgen. We identified clear sex differences in baseline urinary function,  
88 even though relative bladder mass and volume do not significantly differ between male and  
89 female mice. Exogenous testosterone changes several parameters of female mouse urinary  
90 function in the direction of intact males (masculinization). Castration feminizes male mouse  
91 urinary function, but neither finasteride treatment nor a genetically-induced reduction in prostate  
92 mass feminizes male mouse urinary function. We conclude that circulating testosterone is  
93 responsible, in part, for sex differences in baseline mouse voiding function while prostatic lobe  
94 mass plays a lesser role.

## 95 **2. MATERIALS AND METHOD**

### 96 **2.1 Mice**

97 All experiments were conducted under a protocol approved by the University of Wisconsin  
98 Animal Care and Use Committee and in accordance with the National Institutes of Health Guide  
99 for the Care and Use of Laboratory Animals. Mice were housed in Udel<sup>®</sup> Polysulfone

100 microisolator cages on racks or in Innocage<sup>®</sup> disposable mouse cages on an Innorack<sup>®</sup>; room  
101 lighting was maintained on 12 hour light and dark cycles; room temperature was maintained at  
102 20.5 ± 5 C; humidity was 30–70%. Mice were fed 8604 Teklad Rodent Diet (Harlan  
103 Laboratories, Madison WI) and feed and water were available *ad libitum*. Cages contained corn  
104 cob bedding. All endpoint measurements were collected in nine-week-old mice unless specified  
105 otherwise.

106 All mice used in this study were purchased from Jackson Laboratories (Bar Harbor, ME)  
107 and included C57BL/6J (Stock #000664), Tg(Pbsn-cre)4Prb/J (Pbsn4cre, stock number  
108 026662) bred onto the C57BL/6J background for four to five generations,<sup>23</sup> B6.Cg-  
109 Gt(ROSA)26Sor<sup>tm14(CAG-tdTomato)Hze</sup>/J (R26R-Tdtomato, Jax stock #007914),<sup>24</sup> and  
110 Gt(ROSA)26Sortm1(DTA)Jpmb/J (R26R-Dta, Jax stock #006331)<sup>25</sup>. The genotype of mice with  
111 depleted prostatic epithelial cells was Pbsn4<sup>cre/+</sup>; R26R<sup>Dta/+</sup> and their respective littermate  
112 controls were Pbsn4<sup>cre/+</sup>; R26R<sup>TdTomato/+</sup>.

## 113 2.2 Castration/Sham Castration

114 Castration was performed at six weeks of age. Mice were anesthetized with isoflurane and  
115 given ketoprofen (0.5 mg/kg sc) as an analgesic. A midline incision was made in the scrotum,  
116 and the testes were either removed (castrate) or examined (sham controls). The scrotum was  
117 closed using a simple interrupted pattern.

## 118 2.3 Testosterone Capsule Preparation and Implantation

119 Capsules were prepared as previously described.<sup>26</sup> Silastic tubing (Dow Corning, Cat. #  
120 508-008, Silastic Laboratory Tubing, 1.57 mm inside diameter X 3.18 mm outside diameter) was  
121 cut to 16 mm. The wooden stick of cotton tipped applicators (Fisher Scientific Cat. #23-400-100)  
122 was cut into 5 mm pieces and inserted 3 mm into the tubing to plug the ends. 10 mm of the  
123 sham capsule was left empty. 10 mm of the testosterone capsule was filled with 4-androsten-  
124 17beta-ol-3-one (Testosterone, T, ≥99% pure, Steraloids Inc. Cat. # A6950-000). Silastic  
125 capsules were sealed with silastic medical adhesive, type A (Dow Corning, purchased from

126 Factor II Inc, [Product No. A-100]). Testosterone filled silastic capsules have been shown to  
127 effectively increase testosterone in C57BL/6J mice when implanted as described.<sup>27</sup>

128 Mice were anesthetized with isoflurane for silastic capsule implantation and given  
129 ketoprofen (0.5 mg/kg sc). An incision was made on the caudal aspect of the back just to the  
130 right of midline. Capsules were inserted parallel to the spine and the incision was closed with  
131 wound clips.

#### 132 **2.4 Finasteride Treatment**

133 Finasteride (Alfa Aesar, J63454, Ward Hill, MA) was dissolved in 100% EtOH and diluted  
134 in corn oil to make a 10% EtOH/ 90% corn oil dosing solution. The solution was stored at 4°C  
135 for the duration of the experiment. Mice were given finasteride (50 µL of a 40 µg/µL solution)  
136 daily via oral gavage.

#### 137 **2.5 Void Spot Assay**

138 We followed the recommended guidelines of reporting VSA data.<sup>28-30</sup> VSA was  
139 performed in the vivarium where mice were housed one day prior to cystometry and euthanasia.  
140 Whatman grade 540 (Fisher Scientific no. 057163-W) filter papers (27 × 16 cm) were placed in  
141 the bottom of Udel<sup>®</sup> Polysulfone microisolator cages. Mice were placed in the cage (singly  
142 housed) with food *ad libitum* but no water for four hours starting from 8-11 AM GMT. VSA was  
143 performed once a week starting at six weeks of age, allowing for three acclimation sessions  
144 prior to the session at nine weeks of age which was used for analysis. Filter papers were dried  
145 and imaged with an Autochemi AC1 Darkroom ultraviolet imaging cabinet (UVP, Upland, CA)  
146 equipped with an Auto Chemi Zoom lens 2UV and an epi-illuminator. Image capture settings  
147 were adjusted using UVP VisonWorksLS image acquisition software. Images were captured  
148 using an Ethidium Bromide filter set (570-640 nm) and 365 nm epi-illumination. Void Whizzard  
149 was downloaded from [http://imagej.net/Void\\_Whizzard](http://imagej.net/Void_Whizzard) and run according to the user guide.<sup>30</sup>  
150 Analyzed parameters included: Total Spot Count, Total Void Area (cm<sup>2</sup>), % area in center of

151 paper, % area in corners of paper, and mass distribution of spots (0-0.1, 0.1-0.25, 0.25-0.5, 0.5-  
152 1, 1-2, 2-3, 3-4, 4+ cm).

## 153 **2.6 Anesthetized Cystometry**

154 Cystometry was performed with minimal alterations to previously published protocols.<sup>31</sup>  
155 <sup>32</sup> Mice were anesthetized with urethane (1.43 g/kg sc). Thirty minutes after urethane dosing, an  
156 incision was made in the ventral abdomen to expose the bladder. Bladder length and diameter  
157 were measured for volume calculation. A purse-string suture was placed in the bladder dome.  
158 Polyethylene cystostomy tubing (PE50, outer diameter 0.58mm, inner diameter 0.28mm) was  
159 inserted into the bladder through the center of the suture and purse-string secured to hold the  
160 tubing in place with 2-3 mm of tubing within the bladder. The abdominal wall and skin were  
161 closed separately in a simple interrupted pattern. The exterior tubing was secured to the ventral  
162 abdominal skin with two simple interrupted sutures. Mice were placed on a heat pad for one  
163 hour after the procedure.

164 The exposed tube was connected to a three-way stopcock, and the other two arms of  
165 the stopcock were connected to an infusion pump (Harvard Apparatus, Holliston, MA) and  
166 pressure transducer (Memscap AS, Norway). Intravesical pressure was recorded continuously  
167 using a PowerLab data collection system (ADI Instruments, Colorado Springs, CO). Room-  
168 temperature sterile saline (0.9%) was infused into the bladder at a rate of 0.8 mL per hour.

169 Mice were placed in lateral recumbency above a force transducer (Model FT03, grass  
170 Instruments) with a 3D printed urine collection funnel. The force transducer was calibrated with  
171 known volumes of saline to create a pressure-volume conversion. The mass of voided urine  
172 was recorded continuously using PowerLab.

173 At least one hour of voiding activity was recorded. Three to five consecutive voids,  
174 occurring after stabilization of micturition cycles, were used for analyses. Multiple parameters  
175 were measured including: Void Duration, Intervoid Interval, Baseline Pressure, Normalized  
176 Threshold Pressure, Normalized Peak Void Pressure, Number of Non-Voiding Contractions,

177 Voided Volume, Compliance, Volume Flow Rate, Mass Based Flow Rate, and Efficiency  
178 (Calculations used for analysis of cystometric tracings are described in Figure 1, Table 1).

## 179 **2.7 Statistical Analysis**

180 Statistical analyses were performed with Graph Pad Prism 8.0.2 (Graphpad Software, La  
181 Jolla, California). Shapiro-Wilk test was used to test for normality and transformation was  
182 applied to normalize data when possible. The F-test was used to test for homogeneity of  
183 variance for pairwise comparisons. Welsh's correction was applied when variances was  
184 unequal. When variance was equal, comparisons between two groups were made using  
185 Student's t-test. The Mann Whitney test was applied when data could not be normalized through  
186 transformation. Bartlett's test was used to test for homogeneity of variance for multiple  
187 comparisons. Welsh's ANOVA was applied when variance was unequal followed by Tamhane's  
188 T2 multiple comparisons test. When variance was equal, comparisons between groups were  
189 made using ordinary one-way ANOVA followed by Sidak's multiple comparisons test. If data  
190 could not be normalized through transformation, the Kruskal-Wallis test was applied with Dunn's  
191 multiple comparisons test. A  $p < 0.05$  was considered statistically significant. We have also  
192 noted changes that approach significance  $p < 0.10$  when they are consistent with our  
193 hypothesis. These changes are marked with " $\Delta$ " in tables and referred to in text as "trends"  
194 accompanied by the appropriate p-value. All numerical data are presented as mean +/-  
195 standard error of the mean (SEM).

## 196 197 **3. RESULTS**

### 198 **3.1 Male and Female Mouse Baseline Urinary Voiding Physiology Characteristics**

199 We evaluated several voiding parameters in male and female mice to determine the impact  
200 of sex on urinary voiding physiology (Figure 2-A, Figure 4-A, and Table 2). Body mass is greater  
201 in males than females, consistent with previous findings in C57BL/6J mice.<sup>31</sup> Relative bladder



202 mass and volumes were determined by normalizing to body mass. Male and female relative  
203 bladder weight and volume do not significantly differ, consistent with previous studies.<sup>33</sup>

204 We used void spot assay (VSA) as a first approach to evaluate voiding behaviors. The VSA  
205 procedure has been refined considerably in recent years. Methodology improvements minimize  
206 experimental bias, new software enables rigorous and unbiased assessment,<sup>28, 30</sup> and 12  
207 endpoint measurements collected in this study confer a more robust and multidimensional  
208 perspective than the five or less measurements collected in prior comparisons of male and  
209 female C57BL/6J mice.<sup>31, 33</sup> We identified several differences between control male and female  
210 mice. Female mice deposit more total urine (measured by area, cm<sup>2</sup>) in a four-hour period than  
211 males. Our findings differ from that of a previous study involving older mice and using a method  
212 of VSA analysis that excluded urine spots <0.66 cm<sup>2</sup>.<sup>31</sup> It is worth noting that we recently  
213 showed that small void spots are not caused by mice tracking urine from deposited voids, a  
214 rationale for their previous exclusion.<sup>30</sup>

215 Previous studies excluding small and large void spots, or spots in cage corners, did not  
216 observe male-female differences in voiding patterns.<sup>31, 33</sup> When we evaluated the spatial  
217 distribution of voids (center, corners, and in-between), we found that female mice trend toward  
218 depositing less urine in the center of the cage ( $p = 0.0524$ ). We also evaluated the categorical  
219 distribution of VSA spots (0-0.1, 0.1-0.25, 0.25-0.5, 0.5-1, 1-2, 2-3, 3-4, and 4+ cm<sup>2</sup>) and found  
220 that female mice deposit a greater proportion of large voids (4+ cm<sup>2</sup>) than males.

221 We next used anesthetized cystometry (CMG) to evaluate voiding function. This method  
222 has also evolved in recent years. New practices include: 1) A novel method of urethane delivery  
223 (s.c.) that minimizes spontaneous body movements and their associated influence on  
224 intravesicular pressures, 2) computer generated traces that improve accuracy of measured  
225 trace characteristics, and 3) simultaneous collection of intravesical pressure and voided urine  
226 mass allowing for calculation of additional void characteristics. We now routinely collect 11 CMG  
227 endpoint measurements compared to the four to five collected in previous studies. We found

228 that peak void pressures are higher in females than males, consistent with a previous study.<sup>31</sup>  
229 Also consistent with previous studies, we did not observe sex differences in intervoid interval,  
230 number of non-voiding contractions, and voided volume.<sup>31, 33</sup> Novel findings from this study are  
231 that female mice have higher threshold pressures, shorter void durations, and less bladder  
232 compliance than males.

233 The mouse urinary voiding behaviors we report in this study are specific to C57BL/6J  
234 mice and may be different across the multitude of mouse strains, with mice of difference age, as  
235 well as health or disease status. Sex differences and mouse urinary phenotype were previously  
236 reported to be strain specific.<sup>31</sup> Age and disease state in a genetically, surgically, or otherwise  
237 altered mice, could also impact sex differences in mice. We recently documented an aging-  
238 related voiding dysfunction between 2-month and 24-month-old male C57BL/6J mice.<sup>19</sup> Here,  
239 we honed in on urinary function in young adult (1.5 – 3.5-month-old) mice. We performed VSA  
240 on 6, 7, 8, 9, 10, 12, and 14-week old male C57BL/6J mice and all measured endpoints  
241 changed with age (Figure 3, Table 3).

### 242 **3.2 Prostate Mass Reduction Minimally Impacts Baseline Male Mouse Urinary** 243 **Physiology**

244 We hypothesized that the prostate may contribute to sex differences in C57BL/6J mouse  
245 voiding behaviors. We used three strategies to reduce prostate mass and evaluate the resulting  
246 impact on voiding function: Castration, 5 alpha reductase inhibitor (finasteride) treatment, and  
247 genetic prostatic luminal cell ablation. We specifically tested whether our three methods reduce  
248 prostate mass as expected, cause a consistent directional change in VSA and/or CMG voiding  
249 characteristics, and whether the directional change is consistent with “feminization” of urinary  
250 physiology (i.e. same directional change as female compared to male).

251 The influence of castration on male voiding function is summarized in Figure 2-B and  
252 Table 4. Castration, more than any other method to reduce prostate lobe mass, causes the  
253 greatest magnitude of prostate lobe mass reduction, but also reduces body, bladder, seminal

254 vesicle mass, and bladder volume as reported previously in Swiss mice.<sup>34, 35</sup> Castrate and intact  
255 male mice did not overwhelmingly differ in VSA-measured voiding function, but there were some  
256 differences consistent with “feminization” of male urinary physiology. Castrate male mice, like  
257 female mice, deposit more urine in a four-hour monitoring period compared to intact males. This  
258 is consistent with a previous finding of increased urine mass/time in castrate Swiss mice.<sup>35</sup>  
259 Castrate mice are similar to intact males in the percent of voids deposited in the center of the  
260 cage and the number of 4+ cm<sup>2</sup> spots. Castrate males and intact females have a shorter void  
261 duration and a lower bladder compliance than intact males. However, castrate males have a  
262 lower baseline bladder pressure than intact control males, an endpoint that distinguishes them  
263 from females. Additionally, castrate males trend toward a shorter intervoid interval and lower  
264 voided volume than intact males ( $p = 0.0968$  and  $p = 0.0977$  respectively).

265 We next reduced prostate mass by treating mice for two weeks with finasteride (100  
266 mg/kg BID via oral gavage) to block conversion of testosterone to the more potent ligand,  
267 dihydrotestosterone, and reduce androgen concentration in a non-surgical manner. This dosing  
268 paradigm reflects that of a previous study in rats, which reported 24h of sustained serum  
269 finasteride concentrations following a single 100 mg/kg oral dose and a prostate mass reduction  
270 two weeks after treatment.<sup>36</sup> Results are summarized in Figure 2-C and Table 5. Males treated  
271 with finasteride (Males w/ Fin) have significantly smaller seminal vesicles and smaller anterior,  
272 ventral, and lateral prostates than oil-treated control males. Dorsal prostate mass does not differ  
273 between groups. VSA-measured voiding function in males w/ Fin does not differ from control  
274 males. CMG-measured endpoints differed between groups (males w/ Fin had a significantly  
275 larger intervoid interval and voided volume, and trended ( $p=0.0755$ ) toward more non-voiding  
276 contractions than control males). The finasteride-mediated directional changes in voiding  
277 function were different than those caused by castration. We treated female mice (which have a  
278 very low baseline level of testosterone) with finasteride and performed VSA and CMG to  
279 determine the impact of finasteride on female urinary function. Finasteride causes some

280 changes in VSA-measured voiding function in females but no changes in CMG-measured  
281 function (Table 6).

282 To address the impact of reducing prostate mass without surgery or hormone treatment,  
283 we used a genetic strategy to deplete prostatic luminal epithelial cells (Pbsn4<sup>cre/+</sup>; R26R<sup>Dta/+</sup>).  
284 Results are summarized in Figure 2-D and Table 7. *Cre*-driven epithelial cell death reduces  
285 dorsal and lateral prostate mass without significantly changing mass of other prostate lobes or  
286 seminal vesicle. There were no statistical differences in VSA- or CMG-measured voiding  
287 function between Pbsn4<sup>cre/+</sup>; R26R<sup>Dta/+</sup> mice and their genetic controls (Pbsn4<sup>cre/+</sup>; R26R<sup>Td/+</sup>).

288 The results of the three different methods of prostate mass reduction show the complex  
289 interplay of hormones and anatomical urinary tract variation that result in altered urinary function  
290 in male mice. We were surprised that the three methods of prostate reduction had inconsistent  
291 and minimal effects on urinary function. This is possibly due to variability in the localization and  
292 extent of prostate mass reduction among our three methods. In our companion paper, we  
293 explore this further through histologic evaluation of the prostate and urethra structure following  
294 each of our prostate mass manipulations. It is also noteworthy that we evaluated prostate mass  
295 reductions in our study; increases in prostate mass could have discrete impacts on urinary  
296 function.<sup>37</sup>

### 297 **3.3 Exogenous Testosterone Supplementation Masculinizes Female Urinary** 298 **Physiology**

299 Because male castration feminized some of male urinary physiology, and because other  
300 methods of prostate mass reduction failed to recapitulate the resulting changes in male voiding  
301 function, we next tested if circulating testosterone underlies sex differences in mouse urinary  
302 function. We supplemented female mice with exogenous testosterone. We assessed the  
303 supplemented mice for directional changes in VSA/CMG parameters consistent with  
304 “masculinization” of urinary physiology (i.e. the parameters changed in the same direction as  
305 males). Female mice were divided into two groups: control or with silastic testosterone capsule

306 implants (Female w/ T). Capsules were implanted at 6 weeks of age and assessment took place  
307 at 9 weeks of age. Results are summarized in Figure 4-B and Table 8.

308 Females w/ T have a significantly greater body mass but similar bladder mass and  
309 volume compared to female controls. A previous study reported that testosterone does not  
310 change female mouse body weight but increases bladder weight.<sup>35</sup> However, this study used  
311 mice of a different age, strain, environment, and method of testosterone delivery.

312 Testosterone supplementation caused several changes in female voiding function  
313 measured by VSA. Similar to intact males, Female w/ T mice deposit significantly less urine  
314 during a four hour monitoring period, void fewer spots greater than 4 cm<sup>2</sup>, and void a larger  
315 percentage in the center of the paper than female controls. Also similar to males, Female w/ T  
316 mice have a significantly lower threshold pressure, a lower peak void pressure, and higher  
317 bladder compliance than control females. Females w/ T, unlike males, have more void spots --  
318 specifically more 0 to 0.1cm<sup>2</sup> spots than female controls.

319 Female voiding parameters affected by exogenous testosterone include many of the  
320 same parameters that distinguish male from female voiding function. Thus, we conclude that  
321 even though female lower urinary tract anatomy differs from that of males, exogenous  
322 testosterone “masculinizes” female voiding patterns. The clear relationship between  
323 testosterone and sex differences in urinary function was a surprising finding of this study.  
324 Androgen receptor expression and activity is well described in the reproductive tract, but its  
325 expression and activity in the urinary tract isn’t well characterized. A previous report  
326 documented androgen receptor expression in occasional stromal cells of the bladder and weak  
327 staining in the kidney.<sup>38</sup> Another found that pelvic ganglia contain androgen sensitive autonomic  
328 nerves.<sup>39</sup> This finding raises the possibility that androgens can masculinize autonomic signaling  
329 in the female lower urinary tract to drive urinary voiding patterns similar to intact male mice.  
330 Further studies to compare androgen receptor expression of the entire male and female lower

331 urinary tract are needed to better elucidate the influence of androgens on autonomic signaling in  
332 the bladder, prostate and urethra.

333 A VSA feature not accounted for by “masculinization” of urinary function was the  
334 increase in spot count, specifically small spots (0-0.1 cm<sup>2</sup>). We implanted testosterone capsules  
335 into 8-week-old male mice (Male w/ T) and assessed voiding one week later (Table 9). Males w/  
336 T trend toward an increase in total void spot count,  $p=0.0760$ , and small (0-0.1 cm<sup>2</sup>) spot count,  
337  $p=0.0696$ , compared to male controls, making increased voiding frequency a common feature of  
338 exogenous testosterone supplementation in females and intact males (overall  $p<0.0001$  and  
339  $p=0.0760$ , small  $p<0.0001$  and  $p=0.0696$ ).

340 To determine whether restoration of physiologic testosterone induces voiding frequency  
341 in castrate mice, we implanted castrate males with testosterone capsules (Castrate w/ T) at  
342 eight weeks of age and assessed at nine weeks of age (Table 10). Spot count did not increase  
343 when castrate mice were supplemented with testosterone. Therefore, testosterone increases  
344 voiding frequency when increased to supra-physiologic concentrations, but not when depleted  
345 and then returned to physiologic concentrations.

346 A “frequent voider” pattern, as detected by VSA (>100 urine spots deposited on a filter  
347 paper in a four hour monitoring period), was previously noted in approximately 10% of 9-week-  
348 old C57BL/6J mice.<sup>29</sup> In our study, 14.29% of testosterone treated females and 25% of  
349 testosterone treated males were frequent voiders, but no control females and just 11% of  
350 control males were frequent voiders. These results further support the notion that supra-  
351 physiologic testosterone increases voiding frequency and are consistent with increased voiding  
352 frequency in rats and dogs supplemented with testosterone.<sup>40</sup>

#### 353 **4. CONCLUSIONS**

354 We used surgical, pharmacological, and genetic approaches to reduce mouse prostate  
355 mass, and also exposed C57BL/6J mice to exogenous testosterone to determine the influence  
356 of the prostate and testosterone on voiding function. We characterized male and intact female

357 urinary phenotypes using contemporary methodologies and highlighted unique sex differences  
358 in urinary voiding phenotype.

359 Urologic researchers and practitioners are beginning to appreciate that not all male LUTS  
360 arise from urethral occlusion by an enlarged prostate and that additional factors (prostatic  
361 urethra collagen accumulation,<sup>12</sup> prostatic inflammation,<sup>13</sup> and prostate smooth muscle  
362 contraction<sup>14, 15</sup>) also drive LUTS. Mice are instrumental in studying these alternative  
363 mechanisms. It is possible, for example, to induce prostatic inflammation and drive urinary  
364 frequency and pelvic pain in mice modeling LUTS symptomology.<sup>22, 41, 42</sup> It is also possible to  
365 knock-out or overexpress genes and cell types to validate mechanisms arising from clinical  
366 studies and to use mice for pre-clinical safety and efficacy trials of novel therapeutics. Mice fuel  
367 a creative cycle of translational research resulting in specific targeted therapies for men. In in  
368 order to take full advantage of our models, further baseline studies are needed to determine  
369 baseline molecular and cellular contributions to voiding function in our mouse models.

370

## 371 **ACKNOWLEDGEMENTS**

372 Funded by National Institutes of Health grants: U54 DK104310, Summer Program In  
373 Undergraduate Urologic Research (U54 DK104310S1), R01ES001332, R01DK099328,  
374 F31ES028594, TL1TR002375, and University of Wisconsin-Madison, School of Veterinary  
375 Medicine. The content is solely the responsibility of the authors and does not necessarily  
376 represent the official views of the National Institutes of Health.

377

## 378 **REFERENCES**

- 379 1. Girman CJ, Jacobsen SJ, Tsukamoto T, Richard F, Garraway WM, Sagnier PP, et al.  
380 Health-related quality of life associated with lower urinary tract symptoms in four countries.  
381 *Urology*. 1998;51(3):428-36. PubMed PMID: 9510348.  
382 2. Stewart WF, Van Rooyen JB, Cundiff GW, Abrams P, Herzog AR, Corey R, et al.  
383 Prevalence and burden of overactive bladder in the United States. *World J Urol*.  
384 2003;20(6):327-36. Epub 2002/11/15. doi: 10.1007/s00345-002-0301-4. PubMed PMID:  
385 12811491.

- 386 3. Shapiro E, Lepor H. Pathophysiology of clinical benign prostatic hyperplasia. *Urol Clin*  
387 *North Am.* 1995;22(2):285-90. PubMed PMID: 7539174.
- 388 4. Oesterling JE, Jacobsen SJ, Chute CG, Guess HA, Girman CJ, Panser LA, et al. Serum  
389 prostate-specific antigen in a community-based population of healthy men. Establishment of  
390 age-specific reference ranges. *JAMA.* 1993;270(7):860-4. PubMed PMID: 7688054.
- 391 5. Jacobsen SJ, Girman CJ, Lieber MM. Natural history of benign prostatic hyperplasia.  
392 *Urology.* 2001;58(6 Suppl 1):5-16; discussion PubMed PMID: 11750242.
- 393 6. Isaacs JT, Coffey DS. Etiology and disease process of benign prostatic hyperplasia.  
394 *Prostate Suppl.* 1989;2:33-50. PubMed PMID: 2482772.
- 395 7. Mayer EK, Kroeze SG, Chopra S, Bottle A, Patel A. Examining the 'gold standard': a  
396 comparative critical analysis of three consecutive decades of monopolar transurethral resection  
397 of the prostate (TURP) outcomes. *BJU Int.* 2012;110(11):1595-601. Epub 2012/04/30. doi:  
398 10.1111/j.1464-410X.2012.11119.x. PubMed PMID: 22540956.
- 399 8. Barry MJ, Cockett AT, Holtgrewe HL, McConnell JD, Sihelnik SA, Winfield HN.  
400 Relationship of symptoms of prostatism to commonly used physiological and anatomical  
401 measures of the severity of benign prostatic hyperplasia. *J Urol.* 1993;150(2 Pt 1):351-8.  
402 PubMed PMID: 7686980.
- 403 9. Turkbey B, Huang R, Vourganti S, Trivedi H, Bernardo M, Yan P, et al. Age-related  
404 changes in prostate zonal volumes as measured by high-resolution magnetic resonance  
405 imaging (MRI): a cross-sectional study in over 500 patients. *BJU Int.* 2012;110(11):1642-7.  
406 Epub 2012/09/14. doi: 10.1111/j.1464-410X.2012.11469.x. PubMed PMID: 22973825; PubMed  
407 Central PMCID: PMC3816371.
- 408 10. Gnyawali D, Sharma U. Correlation of prostate volume with 'International Prostate  
409 Symptom Score' and 'Benign Prostatic Hyperplasia-Impact Index' in benign prostatic  
410 hyperplasia2016. 6 p.
- 411 11. Lepor H. Pathophysiology of lower urinary tract symptoms in the aging male population.  
412 *Rev Urol.* 2005;7 Suppl 7:S3-S11. PubMed PMID: 16986059; PubMed Central PMCID:  
413 PMC31477625.
- 414 12. Ma J, Gharaee-Kermani M, Kunju L, Hollingsworth JM, Adler J, Arruda EM, et al.  
415 Prostatic fibrosis is associated with lower urinary tract symptoms. *J Urol.* 2012;188(4):1375-81.  
416 Epub 2012/08/17. doi: 10.1016/j.juro.2012.06.007. PubMed PMID: 22906651; PubMed Central  
417 PMCID: PMC3485634.
- 418 13. Nickel JC, Roehrborn CG, O'Leary MP, Bostwick DG, Somerville MC, Rittmaster RS.  
419 The relationship between prostate inflammation and lower urinary tract symptoms: examination  
420 of baseline data from the REDUCE trial. *Eur Urol.* 2008;54(6):1379-84. Epub 2007/11/20. doi:  
421 10.1016/j.eururo.2007.11.026. PubMed PMID: 18036719; PubMed Central PMCID:  
422 PMC32643127.
- 423 14. Caine M, Pfau A, Perlberg S. The use of alpha-adrenergic blockers in benign prostatic  
424 obstruction. *Br J Urol.* 1976;48(4):255-63. PubMed PMID: 61054.
- 425 15. Campbell MF, Walsh PC. *Campbell's urology.* Seventh edition. ed. Philadelphia: W.B.  
426 Saunders Co.; 1998. 3 volumes (xli, 3432 pages, lxxxix) p.
- 427 16. Oliveira DS, Dzinic S, Bonfil AI, Saliganan AD, Sheng S, Bonfil RD. The mouse prostate:  
428 a basic anatomical and histological guideline. *Bosn J Basic Med Sci.* 2016;16(1):8-13. Epub  
429 2016/02/10. doi: 10.17305/bjms.2016.917. PubMed PMID: 26773172; PubMed Central  
430 PMCID: PMC4765945.
- 431 17. Wegner KA, Cadena MT, Trevena R, Turco AE, Gottschalk A, Halberg RB, et al. An  
432 immunohistochemical identification key for cell types in adult mouse prostatic and urethral tissue  
433 sections. *PLoS One.* 2017;12(11):e0188413. Epub 2017/11/16. doi:  
434 10.1371/journal.pone.0188413. PubMed PMID: 29145476; PubMed Central PMCID:  
435 PMC5690684.



- 436 18. McNeal JE. Normal histology of the prostate. *Am J Surg Pathol*. 1988;12(8):619-33.  
437 PubMed PMID: 2456702.
- 438 19. Liu TT, Thomas S, Mclean DT, Roldan-Alzate A, Hernando D, Ricke EA, et al. Prostate  
439 enlargement and altered urinary function are part of the aging process. *Aging (Albany NY)*.  
440 2019;11(9):2653-69. doi: 10.18632/aging.101938. PubMed PMID: 31085797.
- 441 20. Nicholson TM, Ricke EA, Marker PC, Miano JM, Mayer RD, Timms BG, et al.  
442 Testosterone and 17 $\beta$ -estradiol induce glandular prostatic growth, bladder outlet obstruction,  
443 and voiding dysfunction in male mice. *Endocrinology*. 2012;153(11):5556-65. Epub 2012/09/04.  
444 doi: 10.1210/en.2012-1522. PubMed PMID: 22948219; PubMed Central PMCID:  
445 PMCPMC3473198.
- 446 21. Ricke WA, Lee CW, Clapper TR, Schneider AJ, Moore RW, Keil KP, et al. In Utero and  
447 Lactational TCDD Exposure Increases Susceptibility to Lower Urinary Tract Dysfunction in  
448 Adulthood. *Toxicol Sci*. 2016;150(2):429-40. Epub 2016/02/09. doi: 10.1093/toxsci/kfw009.  
449 PubMed PMID: 26865671; PubMed Central PMCID: PMCPMC4900134.
- 450 22. Lee S, Yang G, Bushman W. Prostatic inflammation induces urinary frequency in adult  
451 mice. *PLoS One*. 2015;10(2):e0116827. Epub 2015/02/03. doi: 10.1371/journal.pone.0116827.  
452 PubMed PMID: 25647072; PubMed Central PMCID: PMCPMC4315606.
- 453 23. Wu X, Wu J, Huang J, Powell WC, Zhang J, Matusik RJ, et al. Generation of a prostate  
454 epithelial cell-specific Cre transgenic mouse model for tissue-specific gene ablation. *Mech Dev*.  
455 2001;101(1-2):61-9. PubMed PMID: 11231059.
- 456 24. Madisen L, Zwingman TA, Sunkin SM, Oh SW, Zariwala HA, Gu H, et al. A robust and  
457 high-throughput Cre reporting and characterization system for the whole mouse brain. *Nat*  
458 *Neurosci*. 2010;13(1):133-40. Epub 2009/12/20. doi: 10.1038/nn.2467. PubMed PMID:  
459 20023653; PubMed Central PMCID: PMCPMC2840225.
- 460 25. Ivanova A, Signore M, Caro N, Greene ND, Copp AJ, Martinez-Barbera JP. In vivo  
461 genetic ablation by Cre-mediated expression of diphtheria toxin fragment A. *Genesis*.  
462 2005;43(3):129-35. doi: 10.1002/gene.20162. PubMed PMID: 16267821; PubMed Central  
463 PMCID: PMCPMC2233880.
- 464 26. Keil KP, Mehta V, Branam AM, Abler LL, Buresh-Stiemke RA, Joshi PS, et al. Wnt  
465 inhibitory factor 1 (*Wif1*) is regulated by androgens and enhances androgen-dependent prostate  
466 development. *Endocrinology*. 2012;153(12):6091-103. Epub 2012/10/18. doi: 10.1210/en.2012-  
467 1564. PubMed PMID: 23087175; PubMed Central PMCID: PMCPMC3512059.
- 468 27. Benice TS, Raber J. Testosterone and dihydrotestosterone differentially improve  
469 cognition in aged female mice. *Learn Mem*. 2009;16(8):479-85. Epub 2009/07/24. doi:  
470 10.1101/lm.1428209. PubMed PMID: 19633137; PubMed Central PMCID: PMCPMC2726011.
- 471 28. Hill WG, Zeidel ML, Bjorling DE, Vezina CM. The void spot assay: Recommendations on  
472 the use of a simple micturition assay for mice. *Am J Physiol Renal Physiol*. 2018. Epub  
473 2018/08/29. doi: 10.1152/ajprenal.00350.2018. PubMed PMID: 30156116.
- 474 29. Keil KP, Abler LL, Altmann HM, Bushman W, Marker PC, Li L, et al. Influence of animal  
475 husbandry practices on void spot assay outcomes in C57BL/6J male mice. *NeuroUrol Urodyn*.  
476 2016;35(2):192-8. Epub 2014/11/12. doi: 10.1002/nau.22692. PubMed PMID: 25394276;  
477 PubMed Central PMCID: PMCPMC4428995.
- 478 30. Wegner KA, Abler LL, Oakes SR, Mehta GS, Ritter KE, Hill WG, et al. Void spot assay  
479 procedural optimization and software for rapid and objective quantification of rodent voiding  
480 function, including overlapping urine spots. *Am J Physiol Renal Physiol*. 2018;315(4):F1067-  
481 F80. Epub 2018/07/04. doi: 10.1152/ajprenal.00245.2018. PubMed PMID: 29972322; PubMed  
482 Central PMCID: PMCPMC6230749.
- 483 31. Bjorling DE, Wang Z, Vezina CM, Ricke WA, Keil KP, Yu W, et al. Evaluation of voiding  
484 assays in mice: impact of genetic strains and sex. *Am J Physiol Renal Physiol*.  
485 2015;308(12):F1369-78. Epub 2015/04/22. doi: 10.1152/ajprenal.00072.2015. PubMed PMID:  
486 25904700; PubMed Central PMCID: PMCPMC4469884.

- 487 32. Ritter KE, Wang Z, Vezina CM, Bjorling DE, Southard-Smith EM. Serotonin Receptor 5-  
488 HT3A Affects Development of Bladder Innervation and Urinary Bladder Function. *Front*  
489 *Neurosci.* 2017;11:690. Epub 2017/12/12. doi: 10.3389/fnins.2017.00690. PubMed PMID:  
490 29311772; PubMed Central PMCID: PMC5732969.
- 491 33. Cornelissen LL, Misajet B, Brooks DP, Hicks A. Influence of genetic background and  
492 gender on bladder function in the mouse. *Auton Neurosci.* 2008;140(1-2):53-8. Epub  
493 2008/05/20. doi: 10.1016/j.autneu.2008.04.001. PubMed PMID: 18495551.
- 494 34. Magari T, Shibata Y, Arai S, Kashiwagi B, Suzuki K. Time-dependent effects of  
495 castration on the bladder function and histological changes in the bladder and blood vessels.  
496 *Asian J Androl.* 2014;16(3):457-60. doi: 10.4103/1008-682X.123676. PubMed PMID: 24556746;  
497 PubMed Central PMCID: PMC4023378.
- 498 35. Mucignat-Caretta C, Bondi M, Caretta A. Endocrine status affects bladder size and  
499 postvoid residual urinary volume in mice. *Horm Behav.* 2004;46(1):11-8. doi:  
500 10.1016/j.yhbeh.2004.02.004. PubMed PMID: 15215037.
- 501 36. Kumazaki M, Ando H, Ushijima K, Maekawa T, Motosugi Y, Takada M, et al. Influence of  
502 dosing time on the efficacy and safety of finasteride in rats. *J Pharmacol Exp Ther.*  
503 2011;338(2):718-23. Epub 2011/05/23. doi: 10.1124/jpet.111.182865. PubMed PMID:  
504 21606174.
- 505 37. Wood RW, Baggs RB, Schwarz EM, Messing EM. Initial observations of reduced uroflow  
506 in transgenic adenocarcinoma of murine prostate. *Urology.* 2006;67(6):1324-8. doi:  
507 10.1016/j.urology.2005.12.019. PubMed PMID: 16765198.
- 508 38. Dart DA, Waxman J, Aboagye EO, Bevan CL. Visualising androgen receptor activity in  
509 male and female mice. *PLoS One.* 2013;8(8):e71694. Epub 2013/08/07. doi:  
510 10.1371/journal.pone.0071694. PubMed PMID: 23940781; PubMed Central PMCID:  
511 PMC3737126.
- 512 39. Keast JR, Saunders RJ. Testosterone has potent, selective effects on the morphology of  
513 pelvic autonomic neurons which control the bladder, lower bowel and internal reproductive  
514 organs of the male rat. *Neuroscience.* 1998;85(2):543-56. PubMed PMID: 9622251.
- 515 40. Li J, Tian Y, Guo S, Gu H, Yuan Q, Xie X. Testosterone-induced benign prostatic  
516 hyperplasia rat and dog as facile models to assess drugs targeting lower urinary tract  
517 symptoms. *PLoS One.* 2018;13(1):e0191469. Epub 2018/01/19. doi:  
518 10.1371/journal.pone.0191469. PubMed PMID: 29351556; PubMed Central PMCID:  
519 PMC5774778.
- 520 41. Rudick CN, Berry RE, Johnson JR, Johnston B, Klumpp DJ, Schaeffer AJ, et al.  
521 Uropathogenic *Escherichia coli* induces chronic pelvic pain. *Infect Immun.* 2011;79(2):628-35.  
522 Epub 2010/11/15. doi: 10.1128/IAI.00910-10. PubMed PMID: 21078846; PubMed Central  
523 PMCID: PMC3028831.
- 524 42. Bell-Cohn A, Mazur DJ, Hall CC, Schaeffer AJ, Thumbikat P. Uropathogenic *Escherichia*  
525 *coli*-Induced Fibrosis, leading to Lower Urinary Tract Symptoms, is associated with Type-2  
526 cytokine signaling. *Am J Physiol Renal Physiol.* 2019. Epub 2019/01/09. doi:  
527 10.1152/ajprenal.00222.2018. PubMed PMID: 30623726.
- 528

## 529 **FIGURE AND TABLE LEGENDS**

530 **Figure 1. A cystometry trace with annotated features that were used for calculating the**  
531 **cystometry endpoints in Table 1.** BP 1 & 2 are baseline pressure, the lowest bladder pressure  
532 before bladder filling (BP(1))/ immediately after voiding is complete (BP(2)). NVC is a non-

533 voiding contraction, a bladder pressure spike occurring without urination. TP is the threshold  
534 pressure, the pressure when voiding initiates. PVP is the peak void pressure, the maximal  
535 bladder pressure achieved during voiding.

536

537 **Figure 2. Summary statistics for anatomical and physiological differences across**  
538 **experimental groups evaluated in this study including intact male and female mice,**  
539 **castrate male mice (Castrate Male) mice treated with the steroid 5 alpha reductase**  
540 **inhibitor finasteride (Males w/ Fin), or males genetically engineered to produce diphtheria**  
541 **toxin in luminal epithelial cells, resulting in their depletion (Pbsn4cre+;R26RDta+). All**  
542 results are mean fold differences relative to intact male control. Differences that are significantly  
543 higher than intact males are shown in green and those that are lower than intact males are in  
544 red. Endpoints that do not significantly differ from intact males are in gray. The numerical fold  
545 difference relative to intact males is indicated by the bar size according to the legend at the top  
546 of the figure. Female urinary physiology is different from male at baseline. Castration causes  
547 some changes consistent with feminization of urinary function. Three different methods of  
548 prostate mass reduction held no consistent effects on urinary physiology.

549

550 **Figure 3. Aging (from 6-to-14-weeks-old) alters void spot assay parameters in male**  
551 **C57BL/6J mice.** Thirty mice underwent void spot assay (VSA) at 6 and 7 weeks, twenty at 8  
552 and 10 weeks, and ten at 9, 12, and 14 weeks of age. The relationship between age and each  
553 VSA parameter is shown as box-and-whisker plots. Age groups were compared and A-  
554 designates a significant difference from 6-week-old mice, B- from 7-week-old mice, C- from 8-  
555 week-old mice, and D- from 9 week-old-mice. Six to nine-week-old mice, and ten to fourteen-  
556 week-old mice are statistically similar in void spot assay characteristics. (A) Spot count, (B) total  
557 urine area, (C) percent area in center, and (E-L) all spot sizes are altered with age.

558

559 **Figure 4. Summary statistics for anatomical and physiological differences across**  
560 **experimental groups evaluated in this study including intact male and female mice, and**  
561 **female mice implanted with 1 cm silastic capsules containing crystalline testosterone**  
562 **(Female w/ T).** All results are mean fold differences relative to intact female control. Differences  
563 that are significantly higher than intact females are shown in green and those that are lower  
564 than intact females are in red. Endpoints that do not significantly differ from intact females are  
565 in gray. The numerical fold difference relative to intact females is indicated by the bar size  
566 according to the legend at the top of the figure. Male urinary physiology is different from female  
567 at baseline. The female voiding parameters affected by exogenous testosterone include many  
568 of the same parameters that distinguish male from female voiding function.

569 **Table 1. Formulas for Calculated Cystometry Parameters**

570 **Table 2. Male and Female C57BL/6J Mouse Baseline Urinary Voiding Characteristics**

571 **Table 3. Impact of Age on VSA Characteristics**

572 **Table 4. Impact of Castration on Male Urinary Physiology**

573 **Table 5. Impact of Finasteride on Male Urinary Physiology**

574 **Table 6. Impact of Finasteride on Female Urinary Physiology**

575 **Table 7. Impact of Genetic Prostatic Luminal Cell Ablation on Male Urinary Physiology**

576 **Table 8. Impact of Testosterone on Female Urinary Physiology**

577 **Table 9. Impact of Testosterone on Intact Male Urinary Physiology**

578 **Table 10. Impact of Testosterone on Castrate Male Urinary Physiology**

579

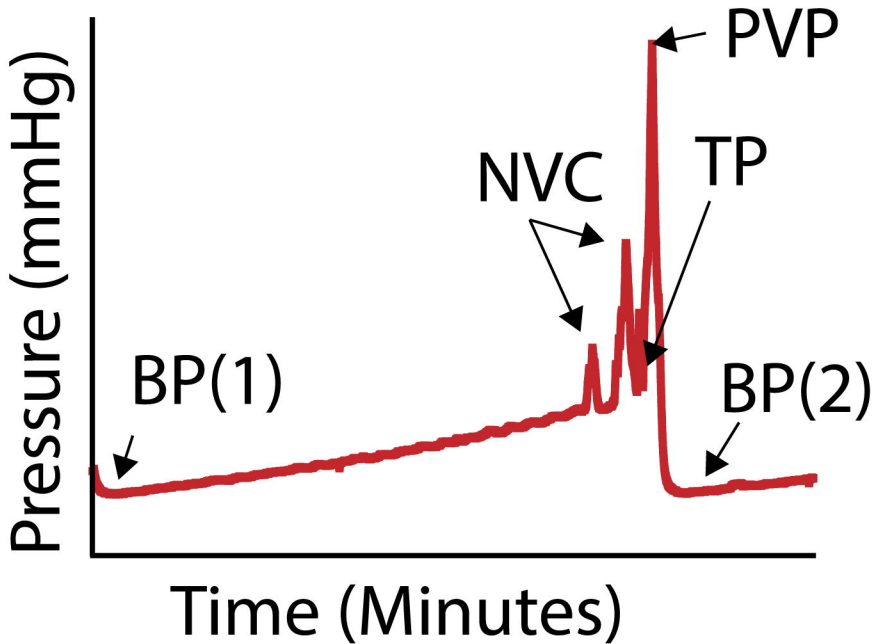

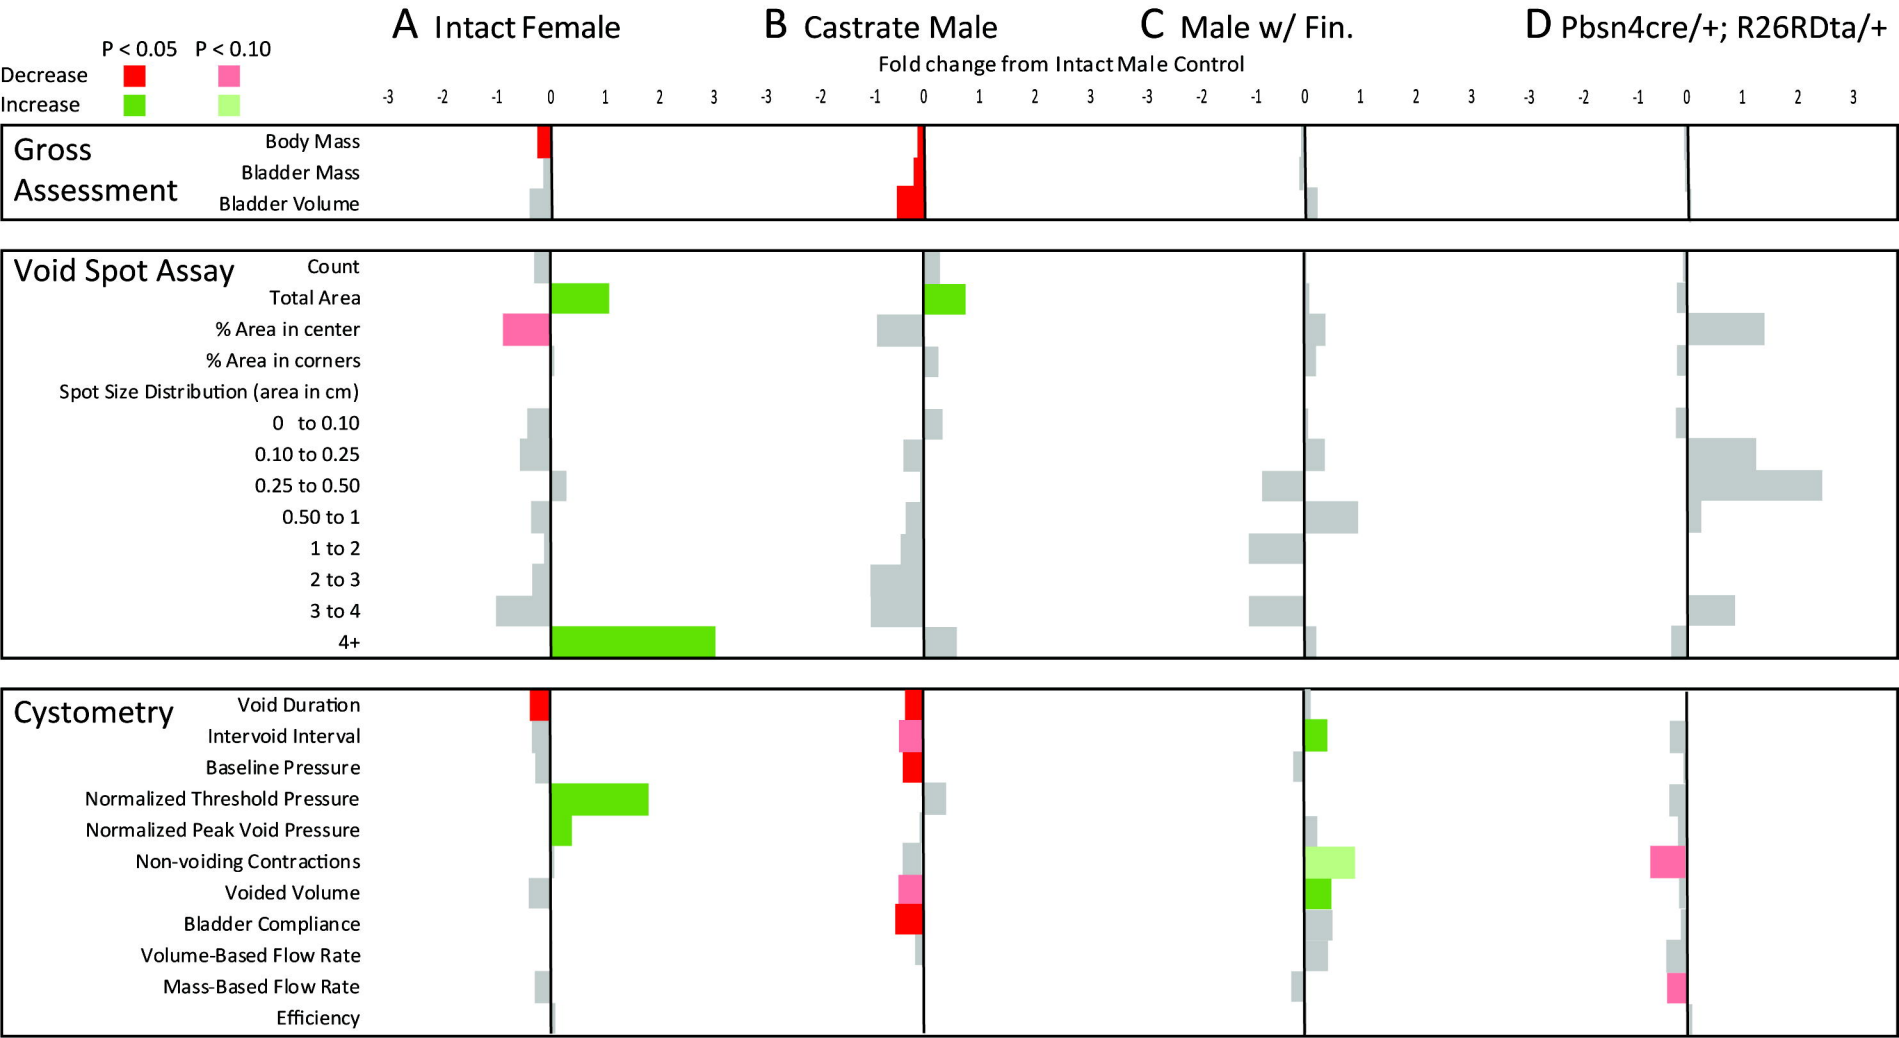

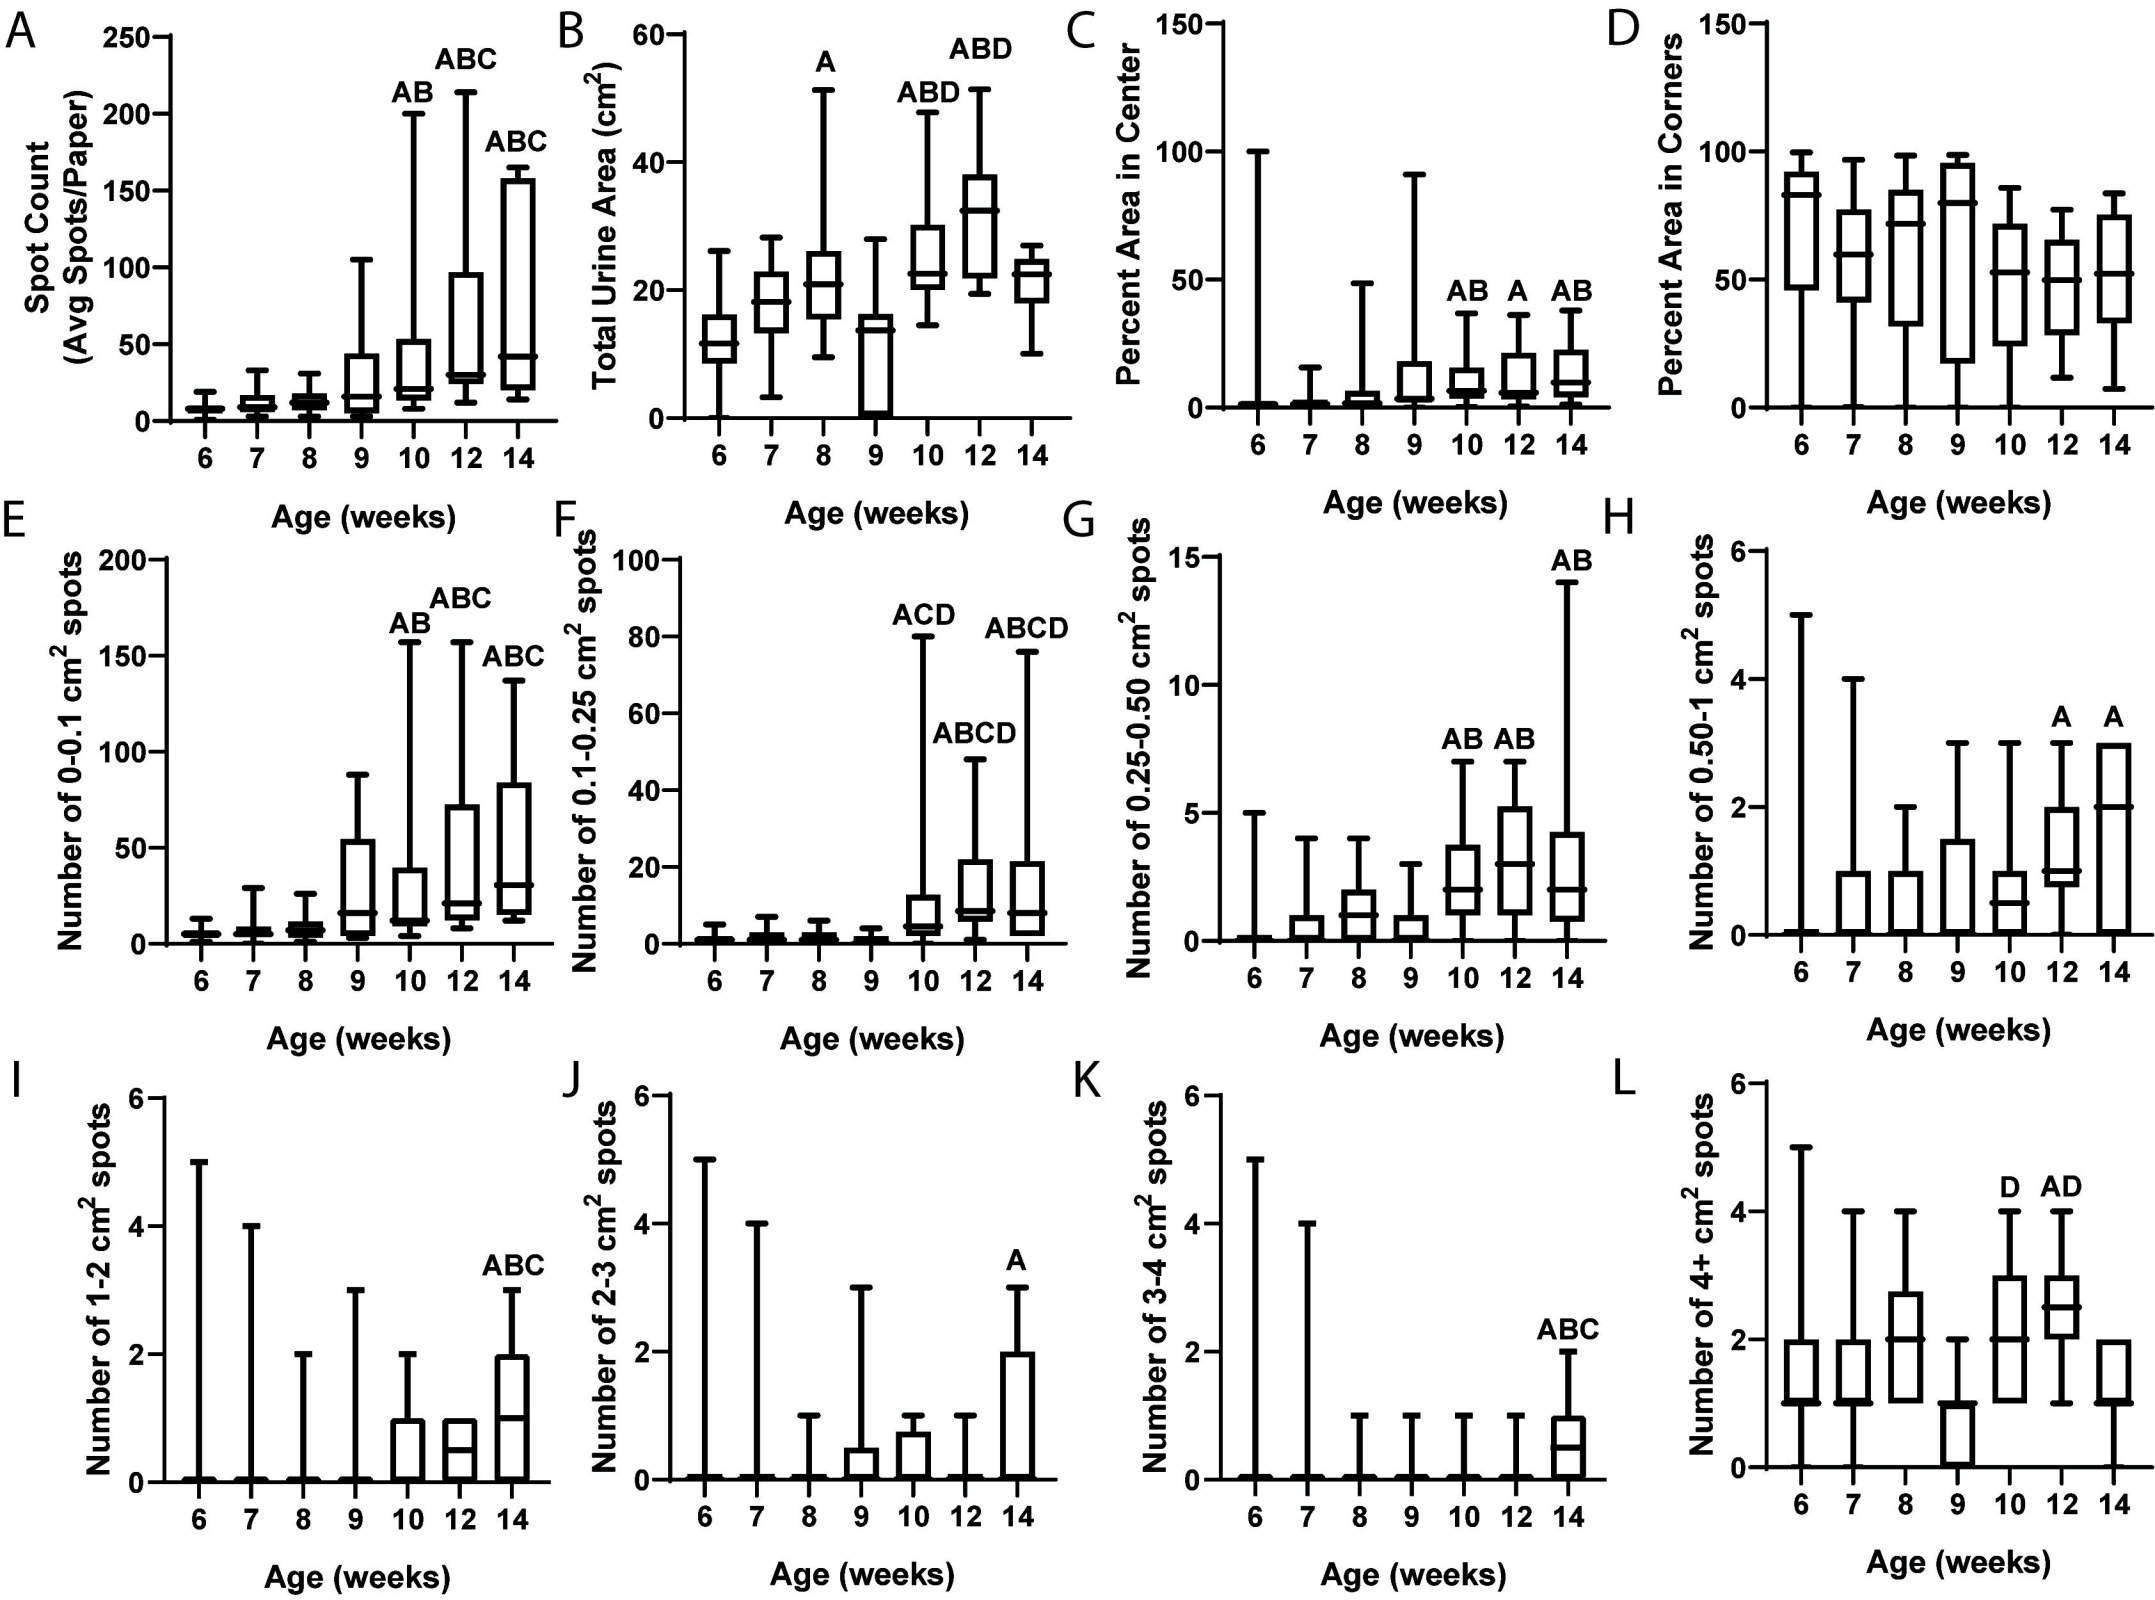

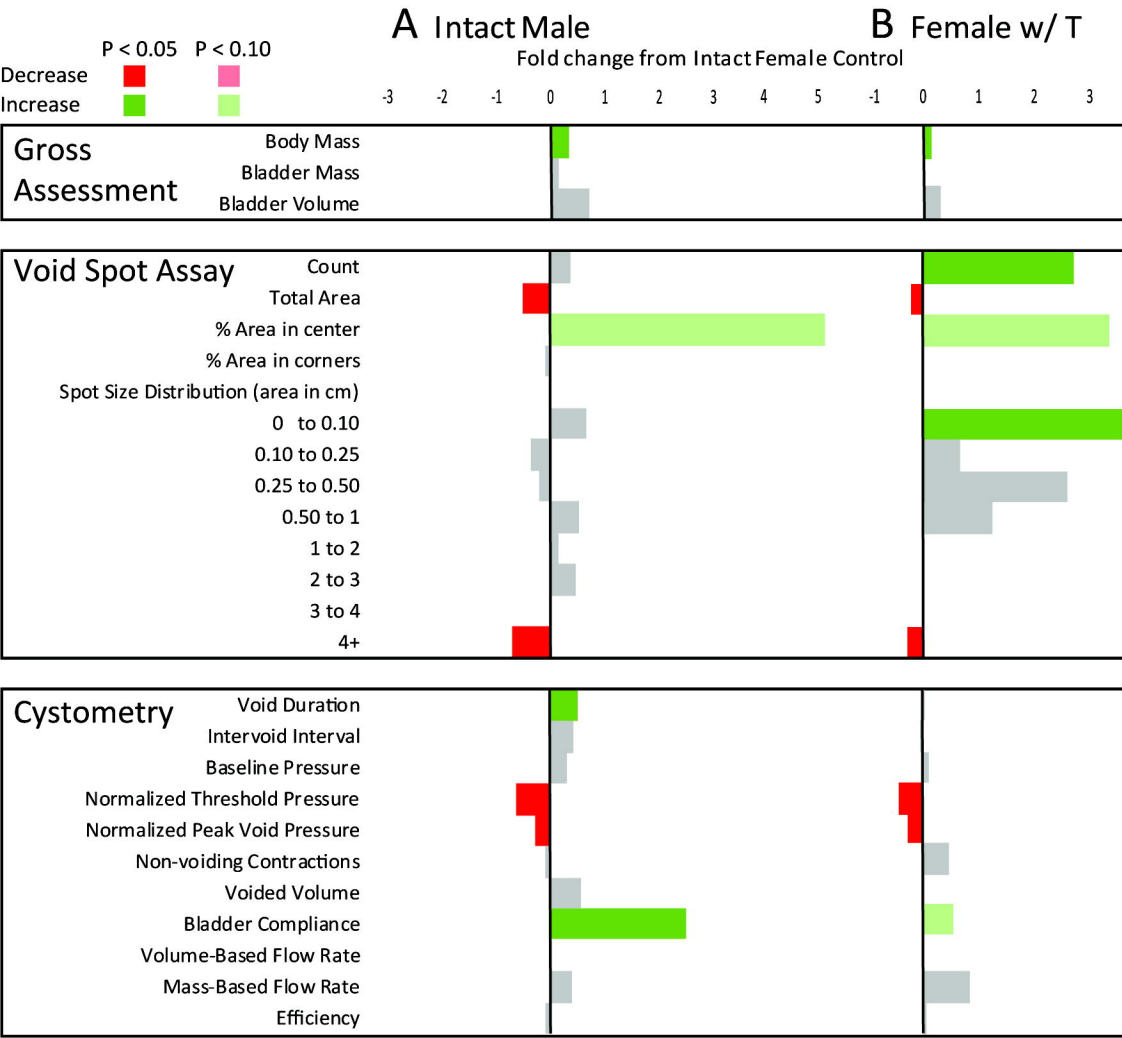



**Table 1.** Formulas for calculated Cystometry Parameters

| <b>CMG Parameter</b>               | <b>Abbreviation</b> | <b>Units</b>      | <b>Description</b>                                                                                                 |
|------------------------------------|---------------------|-------------------|--------------------------------------------------------------------------------------------------------------------|
| Baseline Pressure                  | BP                  | <i>mmHg</i>       | <i>lowest pressure of trace immediately after void; also defines starting point of new void (see figure 1, BP)</i> |
| Number of Non-Voiding Contractions | nNVC                | <i>(no units)</i> | <i>Number of spikes in pressure prior to voiding that did not result in urine excretion (see figure 1, NVC)</i>    |
| Threshold Pressure                 | TP                  | <i>mmHg</i>       | <i>Pressure at start of urination (see figure 1, TP)</i>                                                           |
| Peak Void Pressure                 | PVP                 | <i>mmHg</i>       | <i>Greatest pressure achieved during void(see figure 1, PVP)</i>                                                   |
| Normalized Peak Void Pressure      | NPVP                | <i>mmHg</i>       | $PVP - BP$                                                                                                         |
| Normalized Threshold Pressure      | NTP                 | <i>mmHg</i>       | $TP - BP$                                                                                                          |
| Void Duration                      | VD                  | <i>min</i>        | $(\text{time at BP of void}_{(n+1)}) - (\text{time at TP of void}_n)$                                              |
| Voided Volume                      | VV                  | <i>mL</i>         | $(\text{mass of urine trace after void}) - (\text{mass of urine trace prior to void})$                             |
| Intervoid Interval                 | IVI                 | <i>min</i>        | $(\text{time at PVP of void}_{(n+1)}) - (\text{time at PVP of void}_n)$                                            |
| Infusion Rate                      | IR                  | <i>mL/min</i>     | <i>rate at which the pump infuses saline</i>                                                                       |
| Infusion Duration                  | ID                  | <i>min</i>        | $TP - BP$                                                                                                          |
| Infused Volume                     | IV                  | <i>mL</i>         | $IR \times ID$                                                                                                     |
| Efficiency                         | E                   | <i>%</i>          | $\frac{VV}{IV}$                                                                                                    |
| Compliance                         | C                   | <i>mL/mmHg</i>    | $\frac{IV}{(TP - BP)}$                                                                                             |
| Volume Flow Rate                   | VFR                 | <i>mL/min</i>     | $\frac{VV}{VD}$                                                                                                    |
| Mass Based Flow Rate               | MBFR                | <i>mg/min</i>     | <i>slope of urine mass trace during active voiding</i>                                                             |

**Table 2.** An Update to Male and Female Baseline Urination Characteristics

| <b>Gross Assessment</b>                 |                                    | Values are: Average $\pm$ SEM      |                     |
|-----------------------------------------|------------------------------------|------------------------------------|---------------------|
|                                         | <b>Intact Male<br/>(n = 13)</b>    | <b>Intact Female<br/>(n = 7)</b>   | <b>p-value</b>      |
| <b>Body Mass (g)</b>                    | <b>24.45 <math>\pm</math> 0.49</b> | <b>18.13 <math>\pm</math> 0.40</b> | <b>&lt;0.0001</b>   |
| Bladder                                 |                                    |                                    |                     |
| Mass (% Body Mass)                      | 0.15 $\pm$ 0.01 (n=6)              | 0.13 $\pm$ 0.01                    | 0.1639              |
| Volume (mm <sup>3</sup> /g Body Mass)   | 39.86 $\pm$ 7.46                   | 22.72 $\pm$ 5.41                   | 0.1366              |
| <b>Void Spot Assay</b>                  |                                    |                                    |                     |
|                                         | <b>Intact Male<br/>(n = 9)</b>     | <b>Intact Female<br/>(n = 7)</b>   | <b>p-value</b>      |
| Count                                   | 32.11 $\pm$ 12.67                  | 22.86 $\pm$ 1.16                   | 0.4890              |
| <b>Total Area (cm<sup>2</sup>)</b>      | <b>11.49 <math>\pm</math> 3.17</b> | <b>23.84 <math>\pm</math> 2.13</b> | <b>0.0089</b>       |
| Percent area in center                  | 15.78 $\pm$ 9.97                   | 2.48 $\pm$ 1.48                    | 0.0524 <sup>Δ</sup> |
| Percent area in corners                 | 61.14 $\pm$ 13.26                  | 65.12 $\pm$ 9.69                   | 0.8220              |
| Spots of a certain size (area)          |                                    |                                    |                     |
| 0 - 0.1 cm <sup>2</sup>                 | 28.11 $\pm$ 11.30                  | 16.29 $\pm$ 0.68                   | 0.9740              |
| 0.1 - 0.25 cm <sup>2</sup>              | 1.00 $\pm$ 0.47                    | 1.57 $\pm$ 0.43                    | 0.2940              |
| 0.25 - 0.5 cm <sup>2</sup>              | 0.67 $\pm$ 0.33                    | 0.86 $\pm$ 0.14                    | 0.2550              |
| 0.5 - 1 cm <sup>2</sup>                 | 0.67 $\pm$ 0.37                    | 0.43 $\pm$ 0.20                    | >0.9999             |
| 1 - 2 cm <sup>2</sup>                   | 0.33 $\pm$ 0.33                    | 0.29 $\pm$ 0.18                    | 0.5500              |
| 2 - 3 cm <sup>2</sup>                   | 0.44 $\pm$ 0.34                    | 0.29 $\pm$ 0.29                    | 0.8500              |
| 3 - 4 cm <sup>2</sup>                   | 0.11 $\pm$ 0.11                    | 0 $\pm$ 0                          | >0.9999             |
| <b>4+ cm<sup>2</sup></b>                | <b>0.78 <math>\pm</math> 0.22</b>  | <b>3.14 <math>\pm</math> 0.26</b>  | <b>&lt;0.0010</b>   |
| <b>Cystometry</b>                       |                                    |                                    |                     |
|                                         | <b>Intact Male<br/>(n = 6)</b>     | <b>Intact Female<br/>(n = 7)</b>   | <b>p-value</b>      |
| <b>Void Duration</b>                    | <b>0.64 <math>\pm</math> 0.08</b>  | <b>0.41 <math>\pm</math> 0.02</b>  | <b>0.0252</b>       |
| Intervoid Interval                      | 5.10 $\pm$ 1.18                    | 3.50 $\pm$ 0.46                    | 0.2430              |
| Baseline Pressure                       | 3.61 $\pm$ 0.31                    | 2.68 $\pm$ 0.81                    | 0.2800              |
| <b>Normalized Threshold Pressure</b>    | <b>3.35 <math>\pm</math> 0.32</b>  | <b>9.36 <math>\pm</math> 1.16</b>  | <b>&lt;0.0001</b>   |
| <b>Normalized Peak Void Pressure</b>    | <b>18.37 <math>\pm</math> 2.06</b> | <b>25.35 <math>\pm</math> 1.11</b> | <b>0.0160</b>       |
| Non-voiding contractions                | 2.26 $\pm$ 0.72                    | 2.4 $\pm$ 0.61                     | 0.8840              |
| Voided Volume ( x 10 <sup>-2</sup> )    | 7.60 $\pm$ 1.74                    | 4.72 $\pm$ 0.51                    | 0.1660              |
| <b>Compliance ( x 10<sup>-2</sup>)</b>  | <b>1.92 <math>\pm</math> 0.49</b>  | <b>0.52 <math>\pm</math> 0.10</b>  | <b>0.0025</b>       |
| Volume Flow Rate ( x 10 <sup>-3</sup> ) | 1.98 $\pm$ 0.30                    | 1.96 $\pm$ 0.21                    | 0.9390              |
| Mass Based Flow Rate                    | 23.70 $\pm$ 4.09                   | 16.80 $\pm$ 3.97                   | 0.2530              |
| Efficiency (%)                          | 96.40 $\pm$ 3.98                   | 104.20 $\pm$ 4.24                  | 0.2080              |

**Table 3.** Impact of Age on VSA Characteristics

| Void Spot Assay                | Values are: Average $\pm$ SEM |                  |                               |                   |                                   |                                     |                                     |
|--------------------------------|-------------------------------|------------------|-------------------------------|-------------------|-----------------------------------|-------------------------------------|-------------------------------------|
|                                | 6-week-old                    | 7-week-old       | 8-week-old                    | 9-week-old        | 10-week-old                       | 12-week-old                         | 14-week-old                         |
| Count                          | 8.33 $\pm$ 0.88               | 11.97 $\pm$ 1.50 | 13.20 $\pm$ 1.66              | 32.10 $\pm$ 12.70 | 53.45 $\pm$ 13.66 <sup>A,B</sup>  | 65.90 $\pm$ 20.43 <sup>A,B,C</sup>  | 75.10 $\pm$ 19.38 <sup>A,B,C</sup>  |
| Total Area (cm <sup>2</sup> )  | 12.68 $\pm$ 1.07              | 17.34 $\pm$ 1.22 | 21.89 $\pm$ 2.28 <sup>A</sup> | 11.50 $\pm$ 3.17  | 25.91 $\pm$ 1.88 <sup>A,B,D</sup> | 31.69 $\pm$ 3.08 <sup>A,B,D</sup>   | 21.01 $\pm$ 1.70                    |
| Percent area in center         | 5.26 $\pm$ 3.32               | 2.41 $\pm$ 0.69  | 6.31 $\pm$ 2.57               | 15.80 $\pm$ 9.97  | 10.74 $\pm$ 2.51 <sup>A,B</sup>   | 11.38 $\pm$ 3.95 <sup>A</sup>       | 14.08 $\pm$ 4.08 <sup>A,B</sup>     |
| Percent area in corners        | 69.67 $\pm$ 5.94              | 59.22 $\pm$ 4.30 | 57.87 $\pm$ 7.45              | 61.10 $\pm$ 13.30 | 48.17 $\pm$ 6.24                  | 47.64 $\pm$ 7.06                    | 51.56 $\pm$ 8.19                    |
| Spots of a certain size (area) |                               |                  |                               |                   |                                   |                                     |                                     |
| 0 - 0.1 cm <sup>2</sup>        | 5.37 $\pm$ 0.65               | 7.57 $\pm$ 1.17  | 8.10 $\pm$ 1.29               | 28.10 $\pm$ 11.30 | 35.45 $\pm$ 9.90 <sup>A,B</sup>   | 44.20 $\pm$ 15.56 <sup>A,B,C</sup>  | 50.20 $\pm$ 14.15 <sup>A,B,C</sup>  |
| 0.1 - 0.25 cm <sup>2</sup>     | 1.10 $\pm$ 0.23               | 1.80 $\pm$ 0.35  | 1.55 $\pm$ 0.39               | 1.00 $\pm$ 0.47   | 11.95 $\pm$ 4.40 <sup>A,C,D</sup> | 14.30 $\pm$ 4.47 <sup>A,B,C,D</sup> | 16.20 $\pm$ 7.13 <sup>A,B,C,D</sup> |
| 0.25 - 0.5 cm <sup>2</sup>     | 0.23 $\pm$ 0.11               | 0.37 $\pm$ 0.16  | 1.00 $\pm$ 0.26               | 0.67 $\pm$ 0.33   | 2.25 $\pm$ 0.38 <sup>A,B</sup>    | 3.00 $\pm$ 0.75 <sup>A,B</sup>      | 3.30 $\pm$ 1.29 <sup>A,B</sup>      |
| 0.5 - 1 cm <sup>2</sup>        | 0.20 $\pm$ 0.07               | 0.47 $\pm$ 0.16  | 0.45 $\pm$ 0.14               | 0.67 $\pm$ 0.37   | 0.75 $\pm$ 0.20                   | 1.20 $\pm$ 0.29 <sup>A</sup>        | 1.60 $\pm$ 0.40 <sup>A</sup>        |
| 1 - 2 cm <sup>2</sup>          | 0.07 $\pm$ 0.05               | 0.23 $\pm$ 0.16  | 0.15 $\pm$ 0.11               | 0.33 $\pm$ 0.33   | 0.50 $\pm$ 0.17                   | 0.50 $\pm$ 0.17                     | 1.10 $\pm$ 0.35 <sup>A,B,C</sup>    |
| 2 - 3 cm <sup>2</sup>          | 0 $\pm$ 0                     | 0.07 $\pm$ 0.05  | 0.05 $\pm$ 0.05               | 0.44 $\pm$ 0.34   | 0.25 $\pm$ 0.10                   | 0.10 $\pm$ 0.10                     | 0.80 $\pm$ 0.36 <sup>A</sup>        |
| 3 - 4 cm <sup>2</sup>          | 0.03 $\pm$ 0.03               | 0.07 $\pm$ 0.05  | 0.05 $\pm$ 0.05               | 0.11 $\pm$ 0.11   | 0.15 $\pm$ 0.08                   | 0.10 $\pm$ 0.10                     | 0.60 $\pm$ 0.22 <sup>A,B,C</sup>    |
| 4+ cm <sup>2</sup>             | 1.33 $\pm$ 0.12               | 1.40 $\pm$ 0.14  | 1.85 $\pm$ 0.21               | 0.78 $\pm$ 0.22   | 2.15 $\pm$ 0.22 <sup>D</sup>      | 2.50 $\pm$ 0.27 <sup>A,D</sup>      | 1.30 $\pm$ 0.21                     |

<sup>A</sup>-Significant difference from 6-week-old  
<sup>B</sup>-Significant difference from 7-week-old  
<sup>C</sup>-Significant difference from 8-week-old  
<sup>D</sup>-Significant difference from 9-week-old

**Table 4.** Impact of Castration on Male Urinary Physiology

| <b>Gross Assessment</b>                    |                                         | Values are: Average $\pm$ SEM           |                     |
|--------------------------------------------|-----------------------------------------|-----------------------------------------|---------------------|
|                                            | <b>Intact Male<br/>(n = 13)</b>         | <b>Castrate Male<br/>(n = 14)</b>       | <b>p-value</b>      |
| <b>Body Mass (g)</b>                       | <b>24.45 <math>\pm</math> 0.49</b>      | <b>21.51 <math>\pm</math> 0.41</b>      | <b>&lt;0.0001</b>   |
| <b>Bladder</b>                             |                                         |                                         |                     |
| <b>Mass (% Body Mass)</b>                  | <b>0.15 <math>\pm</math> 0.01 (n=6)</b> | <b>0.12 <math>\pm</math> 0.00 (n=6)</b> | <b>0.0190</b>       |
| <b>Volume (mm<sup>3</sup>/g Body Mass)</b> | <b>39.86 <math>\pm</math> 7.46</b>      | <b>18.04 <math>\pm</math> 3.13</b>      | <b>0.0041</b>       |
| <b>Prostate Mass (% Body Mass)</b>         | <b>0.20 <math>\pm</math> 0.01</b>       | <b>0.03 <math>\pm</math> 0.00</b>       | <b>&lt;0.0001</b>   |
| <b>Anterior Mass (% Body Mass)</b>         | <b>0.09 <math>\pm</math> 0.00</b>       | <b>0.02 <math>\pm</math> 0.00</b>       | <b>&lt;0.0001</b>   |
| <b>Ventral Mass (% Body Mass)</b>          | <b>0.04 <math>\pm</math> 0.00</b>       | <b>0.01 <math>\pm</math> 0.00</b>       | <b>&lt;0.0001</b>   |
| <b>Dorsal Mass (% Body Mass)</b>           | <b>0.04 <math>\pm</math> 0.00</b>       | <b>0.01 <math>\pm</math> 0.00</b>       | <b>&lt;0.0001</b>   |
| <b>Lateral Mass (% Body Mass)</b>          | <b>0.01 <math>\pm</math> 0.00</b>       | <b>0.00 <math>\pm</math> 0.00</b>       | <b>0.0003</b>       |
| <b>Seminal Vesicle Mass (% Body Mass)</b>  | <b>0.62 <math>\pm</math> 0.04</b>       | <b>0.04 <math>\pm</math> 0.00</b>       | <b>&lt;0.0001</b>   |
| <b>Void Spot Assay</b>                     |                                         |                                         |                     |
|                                            | <b>Intact Male<br/>(n = 9)</b>          | <b>Castrate Male<br/>(n = 11)</b>       | <b>p-value</b>      |
| Count                                      | 32.10 $\pm$ 12.70                       | 42.00 $\pm$ 6.10                        | 0.1025              |
| <b>Total Area (cm<sup>2</sup>)</b>         | <b>11.50 <math>\pm</math> 3.17</b>      | <b>20.50 <math>\pm</math> 2.31</b>      | <b>0.0301</b>       |
| Percent area in center                     | 15.80 $\pm$ 9.97                        | 2.34 $\pm$ 0.666                        | 0.1567              |
| Percent area in corners                    | 61.10 $\pm$ 13.30                       | 77.40 $\pm$ 3.96                        | 0.2177              |
| Spots of a certain size (area)             |                                         |                                         |                     |
| 0 - 0.1 cm <sup>2</sup>                    | 28.10 $\pm$ 11.30                       | 38.10 $\pm$ 5.84                        | 0.1472              |
| 0.1 - 0.25 cm <sup>2</sup>                 | 1.00 $\pm$ 0.47                         | 1.36 $\pm$ 0.43                         | 0.5651              |
| 0.25 - 0.5 cm <sup>2</sup>                 | 0.67 $\pm$ 0.33                         | 0.64 $\pm$ 0.15                         | 0.6534              |
| 0.5 - 1 cm <sup>2</sup>                    | 0.67 $\pm$ 0.37                         | 0.46 $\pm$ 0.21                         | 0.9591              |
| 1 - 2 cm <sup>2</sup>                      | 0.33 $\pm$ 0.33                         | 0.18 $\pm$ 0.12                         | >0.9999             |
| 2 - 3 cm <sup>2</sup>                      | 0.44 $\pm$ 0.34                         | 0 $\pm$ 0                               | 0.1895              |
| 3 - 4 cm <sup>2</sup>                      | 0.11 $\pm$ 0.11                         | 0 $\pm$ 0                               | 0.4500              |
| 4+ cm <sup>2</sup>                         | 0.78 $\pm$ 0.22                         | 1.27 $\pm$ 0.14                         | 0.1328              |
| <b>Cystometry</b>                          |                                         |                                         |                     |
|                                            | <b>Intact Male<br/>(n = 6-7)</b>        | <b>Castrate Male<br/>(n = 7-8)</b>      | <b>p-value</b>      |
| <b>Void Duration</b>                       | <b>0.64 <math>\pm</math> 0.08</b>       | <b>0.42 <math>\pm</math> 0.03</b>       | <b>0.0311</b>       |
| Intervoid Interval                         | 5.10 $\pm$ 1.18                         | 2.77 $\pm$ 0.12                         | 0.0968 <sup>Δ</sup> |
| <b>Baseline Pressure</b>                   | <b>3.61 <math>\pm</math> 0.31</b>       | <b>2.21 <math>\pm</math> 0.26</b>       | <b>0.0040</b>       |
| Normalized Threshold Pressure              | 3.35 $\pm$ 0.33                         | 4.75 $\pm$ 0.73                         | 0.1087              |
| Normalized Peak Void Pressure              | 18.40 $\pm$ 2.06                        | 17.20 $\pm$ 0.75                        | 0.6145              |
| Non-voiding contractions                   | 2.26 $\pm$ 0.72                         | 1.46 $\pm$ 0.25                         | 0.3254              |
| Voided Volume (x 10 <sup>-2</sup> )        | 7.60 $\pm$ 1.74                         | 4.05 $\pm$ 0.11                         | 0.0977 <sup>Δ</sup> |
| <b>Compliance (x 10<sup>-2</sup>)</b>      | <b>1.92 <math>\pm</math> 0.49</b>       | <b>0.89 <math>\pm</math> 0.20</b>       | <b>0.0359</b>       |
| Volume Flow Rate (x 10 <sup>-3</sup> )     | 1.98 $\pm$ 0.30                         | 1.69 $\pm$ 0.16                         | 0.3871              |
| Mass Based Flow Rate                       | 23.70 $\pm$ 4.09                        | 23.4 $\pm$ 3.17                         | 0.9452              |
| Efficiency (%)                             | 96.40 $\pm$ 3.98                        | 96.8 $\pm$ 3.306                        | 0.9381              |

**Table 5.** Impact of Finasteride on Male Urinary Physiology

| <b>Gross Assessment</b>                   |                                 |                                 | Values are: Average ± SEM |
|-------------------------------------------|---------------------------------|---------------------------------|---------------------------|
|                                           | <b>Males w/ Oil<br/>(n = 6)</b> | <b>Males w/ Fin<br/>(n = 9)</b> | <b>p-value</b>            |
| Body Mass (g)                             | 24.67 ± 0.36                    | 23.53 ± 0.73                    | 0.2562                    |
| <b>Bladder</b>                            |                                 |                                 |                           |
| Mass (% Body Mass)                        | 0.13 ± 0.01                     | 0.12 ± 0.01                     | 0.3701                    |
| Volume (mm <sup>3</sup> /g Body Mass)     | 33.71 ± 9.25                    | 41.35 ± 6.61                    | 0.5016                    |
| <b>Prostate Mass (% Body Mass)</b>        | <b>0.21 ± 0.01</b>              | <b>0.14 ± 0.01</b>              | <b>0.0009</b>             |
| <b>Anterior Mass (% Body Mass)</b>        | <b>0.11 ± 0.01</b>              | <b>0.07 ± 0.00</b>              | <b>0.0004</b>             |
| <b>Ventral Mass (% Body Mass)</b>         | <b>0.05 ± 0.01</b>              | <b>0.04 ± 0.00</b>              | <b>0.0467</b>             |
| Dorsal Mass (% Body Mass)                 | 0.03 ± 0.00                     | 0.03 ± 0.00                     | 0.3465                    |
| <b>Lateral Mass (% Body Mass)</b>         | <b>0.02 ± 0.00</b>              | <b>0.01 ± 0.00</b>              | <b>0.0292</b>             |
| <b>Seminal Vesicle Mass (% Body Mass)</b> | <b>0.72 ± 0.03</b>              | <b>0.33 ± 0.03</b>              | <b>&lt;0.0001</b>         |
| <b>Void Spot Assay</b>                    |                                 |                                 |                           |
|                                           | <b>Males w/ Oil<br/>(n = 7)</b> | <b>Males w/ Fin<br/>(n = 9)</b> | <b>p-value</b>            |
| Count                                     | 23.20 ± 4.92                    | 24.10 ± 10.10                   | 0.1692                    |
| Total Area (cm <sup>2</sup> )             | 17.00 ± 4.33                    | 18.40 ± 4.41                    | 0.8209                    |
| Percent area in center                    | 8.82 ± 7.54                     | 12.10 ± 11.00                   | 0.8845                    |
| Percent area in corners                   | 48.90 ± 10.90                   | 58.50 ± 13.30                   | 0.3610                    |
| <b>Spots of a certain size (dia.)</b>     |                                 |                                 |                           |
| 0 - 0.1 cm                                | 19.90 ± 4.36                    | 21.00 ± 9.29                    | 0.8658                    |
| 0.1 - 0.25 cm                             | 0.89 ± 0.35                     | 1.22 ± 0.64                     | >0.9999                   |
| 0.25 - 0.5 cm                             | 0.89 ± 0.31                     | 0.22 ± 0.15                     | 0.1312                    |
| 0.5 - 1 cm                                | 0.11 ± 0.11                     | 0.22 ± 0.22                     | >0.9999                   |
| 1 - 2 cm                                  | 0.11 ± 0.11                     | 0 ± 0                           | >0.9999                   |
| 2 - 3 cm                                  | 0.11 ± 0.11                     | 0.11 ± 0.11                     | >0.9999                   |
| 3 - 4 cm                                  | 0.11 ± 0.11                     | 0 ± 0                           | >0.9999                   |
| 4+ cm                                     | 1.11 ± 0.31                     | 1.33 ± 0.33                     | 0.8013                    |
| <b>Cystometry</b>                         |                                 |                                 |                           |
|                                           | <b>Males w/ Oil<br/>(n = 9)</b> | <b>Males w/ Fin<br/>(n = 9)</b> | <b>p-value</b>            |
| Void Duration                             | 0.63 ± 0.07                     | 0.70 ± 0.13                     | 0.8371                    |
| <b>Intervoid Interval</b>                 | <b>3.35 ± 0.44</b>              | <b>4.74 ± 0.42</b>              | <b>0.0394</b>             |
| Baseline Pressure                         | 3.96 ± 0.16                     | 3.13 ± 0.51                     | 0.1590                    |
| Normalized Threshold Pressure             | 3.64 ± 0.67                     | 3.65 ± 0.56                     | 0.9965                    |
| Normalized Peak Void Pressure             | 13.00 ± 0.99                    | 15.90 ± 1.74                    | 0.2011                    |
| Non-voiding contractions                  | 1.21 ± 0.22                     | 2.33 ± 0.53                     | 0.0755 <sup>Δ</sup>       |
| <b>Voided Volume ( x 10<sup>-2</sup>)</b> | <b>4.24 ± 0.69</b>              | <b>6.44 ± 0.47</b>              | <b>0.0168</b>             |
| Compliance ( x 10 <sup>-2</sup> )         | 1.24 ± 0.22                     | 1.89 ± 0.31                     | 0.1280                    |
| Volume Flow Rate ( x 10 <sup>-3</sup> )   | 1.31 ± 0.27                     | 1.87 ± 0.23                     | 0.1377                    |
| Mass Based Flow Rate                      | 22.80 ± 3.63                    | 17.10 ± 1.74                    | 0.1497                    |
| Efficiency (%)                            | 108.00 ± 20.40                  | 110.00 ± 6.85                   | 0.8371                    |

**Table 6.** Impact of Finasteride on Female Urinary Physiology

| <b>Gross Assessment</b>                 |                                    |                                    | Values are: Average $\pm$ SEM |
|-----------------------------------------|------------------------------------|------------------------------------|-------------------------------|
|                                         | <b>Female w/ Oil<br/>(n = 7)</b>   | <b>Female w/ Fin<br/>(n = 5)</b>   | <b>p-value</b>                |
| Body Mass (g)                           | 18.49 $\pm$ 0.42                   | 17.50 $\pm$ 0.31                   | 0.0953 <sup>Δ</sup>           |
| Bladder                                 |                                    |                                    |                               |
| Mass (% Body Mass)                      | 0.12 $\pm$ 0                       | 0.12 $\pm$ 0.01                    | >0.9999                       |
| Volume (mm <sup>3</sup> /g Body Mass)   | 17.82 $\pm$ 3.88                   | 17.27 $\pm$ 3.24                   | 0.9162                        |
| <b>Void Spot Assay</b>                  |                                    |                                    |                               |
|                                         | <b>Female w/ Oil<br/>(n = 7)</b>   | <b>Female w/ Fin<br/>(n = 5)</b>   | <b>p-value</b>                |
| Count                                   | 23.30 $\pm$ 5.73                   | 12.20 $\pm$ 3.16                   | 0.1337                        |
| <b>Total Area (cm<sup>2</sup>)</b>      | <b>22.20 <math>\pm</math> 2.72</b> | <b>11.70 <math>\pm</math> 1.51</b> | <b>0.0083</b>                 |
| Percent area in center                  | 0.65 $\pm$ 0.25                    | 0.49 $\pm$ 0.33                    | 0.1698                        |
| Percent area in corners                 | 67.50 $\pm$ 12.60                  | 73.70 $\pm$ 8.43                   | 0.7023                        |
| Spots of a certain size (dia.)          |                                    |                                    |                               |
| 0 - 0.1 cm                              | 17.90 $\pm$ 5.02                   | 8.50 $\pm$ 2.68                    | 0.1464                        |
| 0.1 - 0.25 cm                           | 1.29 $\pm$ 0.71                    | 0.50 $\pm$ 0.34                    | 0.6166                        |
| 0.25 - 0.5 cm                           | 0.14 $\pm$ 0.14                    | 0.17 $\pm$ 0.17                    | >0.9999                       |
| 0.5 - 1 cm                              | 0.29 $\pm$ 0.18                    | 0.33 $\pm$ 0.21                    | >0.9999                       |
| 1 - 2 cm                                | 0.29 $\pm$ 0.18                    | 0.50 $\pm$ 0.34                    | 0.7797                        |
| 2 - 3 cm                                | 0.14 $\pm$ 0.14                    | 0.83 $\pm$ 0.31                    | 0.0862 <sup>Δ</sup>           |
| 3 - 4 cm                                | 0.71 $\pm$ 0.71                    | 0 $\pm$ 0                          | >0.9999                       |
| <b>4+ cm</b>                            | <b>2.57 <math>\pm</math> 0.297</b> | <b>1.33 <math>\pm</math> 0.21</b>  | <b>0.0087</b>                 |
| <b>Cystometry</b>                       |                                    |                                    |                               |
|                                         | <b>Female w/ Oil<br/>(n = 7)</b>   | <b>Female w/ Fin<br/>(n = 5)</b>   | <b>p-value</b>                |
| Void Duration                           | 0.51 $\pm$ 0.05                    | 0.47 $\pm$ 0.03                    | 0.5419                        |
| Intervoid Interval                      | 2.90 $\pm$ 0.56                    | 2.49 $\pm$ 0.30                    | 0.5803                        |
| Baseline Pressure                       | 5.70 $\pm$ 1.25                    | 4.88 $\pm$ 0.83                    | 0.6330                        |
| Normalized Threshold Pressure           | 11.3 $\pm$ 1.87                    | 8.22 $\pm$ 0.75                    | 0.2212                        |
| Normalized Peak Void Pressure           | 25.2 $\pm$ 1.32                    | 21.70 $\pm$ 1.38                   | 0.0965 <sup>Δ</sup>           |
| Non-voiding contractions                | 3.63 $\pm$ 0.112                   | 1.64 $\pm$ 0.47                    | 0.3422                        |
| Voided Volume ( x 10 <sup>-2</sup> )    | 4.10 $\pm$ 0.638                   | 3.72 $\pm$ 0.42                    | 0.6595                        |
| Compliance ( x 10 <sup>-2</sup> )       | 0.29 $\pm$ 0.04                    | 0.37 $\pm$ 0.06                    | 0.2640                        |
| Volume Flow Rate ( x 10 <sup>-3</sup> ) | 1.39 $\pm$ 0.20                    | 1.37 $\pm$ 0.22                    | 0.9335                        |
| Mass Based Flow Rate                    | 17.90 $\pm$ 9.02                   | 7.99 $\pm$ 1.10                    | 0.4346                        |
| Efficiency (%)                          | 111.00 $\pm$ 4.55                  | 114.00 $\pm$ 6.44                  | 0.7246                        |

**Table 7.** Impact of Genetic Prostatic Luminal Cell Ablation on Male Urinary Physiology

| <b>Gross Assessment</b>                | Values are: Average ± SEM                                    |                                                               |                     |
|----------------------------------------|--------------------------------------------------------------|---------------------------------------------------------------|---------------------|
|                                        | <b>Pbsn4<sup>cre/+</sup>; R26R<sup>Td/+</sup></b><br>(n = 8) | <b>Pbsn4<sup>cre/+</sup>; R26R<sup>Dta/+</sup></b><br>(n = 4) | <b>p-value</b>      |
| Body Mass (g)                          | 25.58 ± 0.59                                                 | 24.35 ± 0.80                                                  | 0.1414              |
| Bladder                                |                                                              |                                                               |                     |
| Mass (% Body Mass)                     | 0.15 ± 0.01                                                  | 0.14 ± 0.00                                                   | 0.5442              |
| Volume (mm <sup>3</sup> /g Body Mass)  | 35.52 ± 6.16                                                 | 36.98 ± 10.11                                                 | 0.8992              |
| Prostate Mass (% Body Mass)            | 0.22 ± 0.02                                                  | 0.20 ± 0.01                                                   | 0.3434              |
| Anterior Mass (% Body Mass)            | 0.11 ± 0.00                                                  | 0.12 ± 0.01                                                   | 0.4629              |
| Ventral Mass (% Body Mass)             | 0.05 ± 0.01                                                  | 0.06 ± 0.00                                                   | 0.6707              |
| <b>Dorsal Mass (% Body Mass)</b>       | <b>0.05 ± 0.00</b>                                           | <b>0.03 ± 0.00</b>                                            | <b>0.0222</b>       |
| <b>Lateral Mass (% Body Mass)</b>      | <b>0.01 ± 0.00</b>                                           | <b>0.00 ± 0.00</b>                                            | <b>0.0242</b>       |
| Seminal Vesicle Mass (% Body Mass)     | 0.76 ± 0.04                                                  | 0.72 ± 0.03                                                   | 0.5431              |
| <b>Void Spot Assay</b>                 |                                                              |                                                               |                     |
|                                        | <b>Pbsn4<sup>cre/+</sup>; R26R<sup>Td/+</sup></b><br>(n = 8) | <b>Pbsn4<sup>cre/+</sup>; R26R<sup>Dta/+</sup></b><br>(n = 4) | <b>p-value</b>      |
| Count                                  | 78.10 ± 30.09                                                | 73.00 ± 54.70                                                 | 0.3677              |
| Total Area (cm <sup>2</sup> )          | 36.60 ± 3.55                                                 | 30.60 ± 6.96                                                  | 0.4060              |
| Percent area in center                 | 5.47 ± 2.30                                                  | 13.50 ± 13.30                                                 | 0.2141              |
| Percent area in corners                | 69.40 ± 6.49                                                 | 56.00 ± 20.50                                                 | 0.4413              |
| Spots of a certain size (dia.)         |                                                              |                                                               |                     |
| 0 - 0.1 cm                             | 67.30 ± 26.50                                                | 51.30 ± 36.10                                                 | 0.3455              |
| 0.1 - 0.25 cm                          | 6.00 ± 4.02                                                  | 14.00 ± 13.70                                                 | 0.3939              |
| 0.25 - 0.5 cm                          | 1.25 ± 0.49                                                  | 4.50 ± 4.17                                                   | 0.8990              |
| 0.5 - 1 cm                             | 1.00 ± 0.38                                                  | 1.25 ± 0.95                                                   | >0.9999             |
| 1 - 2 cm                               | 0 ± 0                                                        | 0 ± 0                                                         | >0.9999             |
| 2 - 3 cm                               | 0 ± 0                                                        | 0 ± 0                                                         | >0.9999             |
| 3 - 4 cm                               | 0.13 ± 0.13                                                  | 0.25 ± 0.25                                                   | >0.9999             |
| 4+ cm                                  | 2.50 ± 0.27                                                  | 1.75 ± 0.25                                                   | 0.1293              |
| <b>Cystometry</b>                      |                                                              |                                                               |                     |
|                                        | <b>Pbsn4<sup>cre/+</sup>; R26R<sup>Td/+</sup></b><br>(n = 8) | <b>Pbsn4<sup>cre/+</sup>; R26R<sup>Dta/+</sup></b><br>(n = 4) | <b>p-value</b>      |
| Void Duration                          | 0.44 ± 0.06                                                  | 0.44 ± 0.07                                                   | 0.9972              |
| Intervoid Interval                     | 5.32 ± 0.80                                                  | 3.76 ± 0.87                                                   | 0.2546              |
| Baseline Pressure                      | 2.44 ± 0.26                                                  | 2.34 ± 0.62                                                   | 0.7471              |
| Normalized Threshold Pressure          | 5.68 ± 1.59                                                  | 3.65 ± 0.77                                                   | 0.4083              |
| Normalized Peak Void Pressure          | 19.70 ± 3.51                                                 | 16.70 ± 4.80                                                  | 0.6277              |
| Non-voiding contractions               | 6.60 ± 2.06                                                  | 2.12 ± 0.57                                                   | 0.0695 <sup>Δ</sup> |
| Voided Volume (x 10 <sup>-2</sup> )    | 6.97 ± 1.09                                                  | 6.14 ± 1.24                                                   | 0.6720              |
| Compliance (x 10 <sup>-2</sup> )       | 1.81 ± 0.35                                                  | 1.59 ± 0.452                                                  | 0.7230              |
| Volume Flow Rate (x 10 <sup>-3</sup> ) | 3.69 ± 1.02                                                  | 2.21 ± 0.214                                                  | 0.3574              |
| Mass Based Flow Rate                   | 31.70 ± 2.49                                                 | 19.90 ± 6.63                                                  | 0.0672 <sup>Δ</sup> |
| Efficiency (%)                         | 107.00 ± 8.21                                                | 114.00 ± 12.80                                                | 0.6029              |

**Table 8.** Impact of Testosterone on Female Urinary Physiology

| <b>Gross Assessment</b>                 |                                    | Values are: Average $\pm$ SEM       |                     |
|-----------------------------------------|------------------------------------|-------------------------------------|---------------------|
|                                         | <b>Intact Female<br/>(n = 7)</b>   | <b>Female w/ T<br/>(n=7)</b>        | <b>p-value</b>      |
| <b>Body Mass (g)</b>                    | <b>18.13 <math>\pm</math> 0.40</b> | <b>20.66 <math>\pm</math> 0.32</b>  | <b>0.0004</b>       |
| Bladder                                 |                                    |                                     |                     |
| Mass (% Body Mass)                      | 0.13 $\pm$ 0.01                    | 0.13 $\pm$ 0.01                     | >0.9999             |
| Volume (mm <sup>3</sup> /g Body Mass)   | 22.72 $\pm$ 5.41                   | 30.43 $\pm$ 5.84 (n=6)              | 0.3534              |
| <b>Void Spot Assay</b>                  |                                    |                                     |                     |
|                                         | <b>Intact Female<br/>(n = 7)</b>   | <b>Female w/ T<br/>(n=7)</b>        | <b>p-value</b>      |
| <b>Count</b>                            | <b>22.86 <math>\pm</math> 1.16</b> | <b>91.00 <math>\pm</math> 19.95</b> | <b>&lt;0.0001</b>   |
| <b>Total Area (cm<sup>2</sup>)</b>      | <b>23.84 <math>\pm</math> 2.13</b> | <b>17.82 <math>\pm</math> 1.56</b>  | <b>0.0415</b>       |
| Percent area in center                  | 2.48 $\pm$ 1.48                    | 11.55 $\pm$ 4.15                    | 0.0524 <sup>Δ</sup> |
| Percent area in corners                 | 65.12 $\pm$ 9.69                   | 66.84 $\pm$ 9.72                    | 0.9025              |
| Spots of a certain size (area)          |                                    |                                     |                     |
| <b>0 - 0.1 cm<sup>2</sup></b>           | <b>16.29 <math>\pm</math> 0.68</b> | <b>81.00 <math>\pm</math> 15.43</b> | <b>&lt;0.0001</b>   |
| 0.1 - 0.25 cm <sup>2</sup>              | 1.57 $\pm$ 0.43                    | 2.71 $\pm$ 1.41                     | 0.9930              |
| 0.25 - 0.5 cm <sup>2</sup>              | 0.86 $\pm$ 0.14                    | 3.29 $\pm$ 2.80                     | 0.4700              |
| 0.5 - 1 cm <sup>2</sup>                 | 0.43 $\pm$ 0.20                    | 1.00 $\pm$ 0.53                     | 0.6941              |
| 1 - 2 cm <sup>2</sup>                   | 0.29 $\pm$ 0.18                    | 0.29 $\pm$ 0.29                     | 0.7220              |
| 2 - 3 cm <sup>2</sup>                   | 0.29 $\pm$ 0.29                    | 0.29 $\pm$ 0.29                     | >0.9999             |
| 3 - 4 cm <sup>2</sup>                   | 0 $\pm$ 0                          | 0.29 $\pm$ 0.18                     | 0.4620              |
| <b>4+ cm<sup>2</sup></b>                | <b>3.14 <math>\pm</math> 0.26</b>  | <b>2.14 <math>\pm</math> 0.26</b>   | <b>0.0189</b>       |
| <b>Cystometry</b>                       |                                    |                                     |                     |
|                                         | <b>Intact Female<br/>(n = 6)</b>   | <b>Female w/ T<br/>(n = 5)</b>      | <b>p-value</b>      |
| Void Duration                           | 0.41 $\pm$ 0.02                    | 0.42 $\pm$ 0.02                     | 0.7880              |
| Intervoid Interval                      | 3.50 $\pm$ 0.46                    | 3.39 $\pm$ 0.56                     | 0.8860              |
| Baseline Pressure                       | 2.68 $\pm$ 0.81                    | 2.99 $\pm$ 0.75                     | 0.7860              |
| <b>Normalized Threshold Pressure</b>    | <b>9.36 <math>\pm</math> 1.16</b>  | <b>5.13 <math>\pm</math> 1.13</b>   | <b>0.0207</b>       |
| <b>Normalized Peak Void Pressure</b>    | <b>25.35 <math>\pm</math> 1.11</b> | <b>17.76 <math>\pm</math> 0.89</b>  | <b>0.0006</b>       |
| Non-voiding contractions                | 2.4 $\pm$ 0.61                     | 3.68 $\pm$ 0.43                     | 0.1700              |
| Voided Volume ( x 10 <sup>-2</sup> )    | 4.72 $\pm$ 0.51                    | 4.88 $\pm$ 0.98                     | 0.8870              |
| Compliance ( x 10 <sup>-2</sup> )       | 0.52 $\pm$ 0.10                    | 0.83 $\pm$ 0.11                     | 0.0714 <sup>Δ</sup> |
| Volume Flow Rate ( x 10 <sup>-3</sup> ) | 1.96 $\pm$ 0.21                    | 1.94 $\pm$ 0.34                     | 0.9580              |
| Mass Based Flow Rate                    | 16.80 $\pm$ 3.97                   | 32.50 $\pm$ 12.30                   | 0.1620              |
| Efficiency (%)                          | 104.20 $\pm$ 4.24                  | 111.80 $\pm$ 10.91                  | 0.5050              |



**Table 9.** Impact of Testosterone on Intact Male Urinary Physiology

| <b>Gross Assessment</b>                       |                                    | Values are: Average $\pm$ SEM      |                     |
|-----------------------------------------------|------------------------------------|------------------------------------|---------------------|
|                                               | <b>Intact Male<br/>(n = 13)</b>    | <b>Male w/ T<br/>(n = 8)</b>       | <b>p-value</b>      |
| Body Mass (g)                                 | 24.45 $\pm$ 0.49                   | 24.55 $\pm$ 0.56                   | 0.9015              |
| Bladder Volume (mm <sup>3</sup> /g Body Mass) | 39.86 $\pm$ 7.46                   | 48.33 $\pm$ 8.91                   | 0.3996              |
| <b>Prostate Mass (% Body Mass)</b>            | <b>0.20 <math>\pm</math> 0.01</b>  | <b>0.27 <math>\pm</math> 0.03</b>  | <b>0.0009</b>       |
| <b>Anterior Mass (% Body Mass)</b>            | <b>0.09 <math>\pm</math> 0.00</b>  | <b>0.13 <math>\pm</math> 0.01</b>  | <b>&lt;0.0001</b>   |
| Ventral Mass (% Body Mass)                    | 0.04 $\pm$ 0.00                    | 0.05 $\pm$ 0.01                    | 0.1341              |
| Dorsal Mass (% Body Mass)                     | 0.04 $\pm$ 0.00                    | 0.05 $\pm$ 0.01                    | 0.7933              |
| Lateral Mass (% Body Mass)                    | 0.01 $\pm$ 0.00                    | 0.03 $\pm$ 0.01                    | 0.0829 <sup>Δ</sup> |
| Seminal Vesicle Mass (% Body Mass)            | 0.62 $\pm$ 0.04                    | 0.81 $\pm$ 0.11                    | 0.4025              |
| <b>Void Spot Assay</b>                        |                                    |                                    |                     |
|                                               | <b>Intact Male<br/>(n = 9)</b>     | <b>Male w/ T<br/>(n = 8)</b>       | <b>p-value</b>      |
| Count                                         | 32.10 $\pm$ 12.70                  | 83.50 $\pm$ 29.49                  | 0.0760 <sup>Δ</sup> |
| <b>Total Area (cm<sup>2</sup>)</b>            | <b>11.50 <math>\pm</math> 3.17</b> | <b>24.49 <math>\pm</math> 3.41</b> | <b>0.0325</b>       |
| Percent area in center                        | 15.80 $\pm$ 9.97                   | 4.26 $\pm$ 0.62                    | 0.2043              |
| Percent area in corners                       | 61.10 $\pm$ 13.30                  | 67.35 $\pm$ 11.98                  | 0.7805              |
| Spots of a certain size (area)                |                                    |                                    |                     |
| 0 - 0.1 cm <sup>2</sup>                       | 28.10 $\pm$ 11.30                  | 76.00 $\pm$ 27.49                  | 0.0696 <sup>Δ</sup> |
| 0.1 - 0.25 cm <sup>2</sup>                    | 1.00 $\pm$ 0.47                    | 2.50 $\pm$ 1.26                    | 0.3021              |
| 0.25 - 0.5 cm <sup>2</sup>                    | 0.67 $\pm$ 0.33                    | 1.00 $\pm$ 0.41                    | 0.4476              |
| 0.5 - 1 cm <sup>2</sup>                       | 0.67 $\pm$ 0.37                    | 0.50 $\pm$ 0.29                    | >0.9999             |
| 1 - 2 cm <sup>2</sup>                         | 0.33 $\pm$ 0.33                    | 1.00 $\pm$ 0.71                    | 0.2028              |
| 2 - 3 cm <sup>2</sup>                         | 0.44 $\pm$ 0.34                    | 0.50 $\pm$ 0.50                    | >0.9999             |
| 3 - 4 cm <sup>2</sup>                         | 0.11 $\pm$ 0.11                    | 0.50 $\pm$ 0.50                    | 0.7692              |
| 4+ cm <sup>2</sup>                            | 0.78 $\pm$ 0.22                    | 1.50 $\pm$ 0.29                    | 0.2042              |
| <b>Cystometry</b>                             |                                    |                                    |                     |
|                                               | <b>Intact Male<br/>(n = 6-7)</b>   | <b>Male w/ T<br/>(n = 8)</b>       | <b>p-value</b>      |
| Void Duration                                 | 0.64 $\pm$ 0.08                    | 0.63 $\pm$ 0.03                    | 0.9266              |
| Intervoid Interval                            | 5.10 $\pm$ 1.18                    | 5.67 $\pm$ 0.67                    | 0.6714              |
| Baseline Pressure                             | 3.61 $\pm$ 0.31                    | 2.91 $\pm$ 0.47                    | 0.2477              |
| Normalized Threshold Pressure                 | 3.35 $\pm$ 0.33                    | 3.84 $\pm$ 0.55                    | 0.4781              |
| Normalized Peak Void Pressure                 | 18.40 $\pm$ 2.06                   | 21.26 $\pm$ 1.90                   | 0.3205              |
| <b>Non-voiding contractions</b>               | <b>2.26 <math>\pm</math> 0.72</b>  | <b>5.09 <math>\pm</math> 0.37</b>  | <b>0.0029</b>       |
| Voided Volume ( x 10 <sup>-2</sup> )          | 7.60 $\pm$ 1.74                    | 7.56 $\pm$ 1.15                    | 0.9874              |
| Compliance ( x 10 <sup>-2</sup> )             | 1.92 $\pm$ 0.49                    | 2.23 $\pm$ 0.35                    | 0.6342              |
| Volume Flow Rate ( x 10 <sup>-3</sup> )       | 1.98 $\pm$ 0.30                    | 2.08 $\pm$ 0.32                    | 0.8395              |
| Mass Based Flow Rate                          | 23.70 $\pm$ 4.09                   | 18.26 $\pm$ 2.61                   | 0.2621              |
| Efficiency (%)                                | 96.40 $\pm$ 3.98                   | 117.30 $\pm$ 19.39                 | 0.4630              |

**Table 10.** Impact of Testosterone on Castrate Male Urinary Physiology

| <b>Gross Assessment</b>                    |                                    | Values are: Average $\pm$ SEM      |                   |
|--------------------------------------------|------------------------------------|------------------------------------|-------------------|
|                                            | <b>Castrate Male<br/>(n = 14)</b>  | <b>Castrate w/ T<br/>(n=8)</b>     | <b>p-value</b>    |
| <b>Body Mass (g)</b>                       | <b>21.51 <math>\pm</math> 0.41</b> | <b>23.65 <math>\pm</math> 0.69</b> | <b>0.0023</b>     |
| <b>Bladder</b>                             |                                    |                                    |                   |
| <b>Volume (mm<sup>3</sup>/g Body Mass)</b> | <b>18.04 <math>\pm</math> 3.13</b> | <b>33.57 <math>\pm</math> 6.89</b> | <b>0.0192</b>     |
| <b>Prostate Mass (% Body Mass)</b>         | <b>0.03 <math>\pm</math> 0.00</b>  | <b>0.21 <math>\pm</math> 0.02</b>  | <b>&lt;0.0001</b> |
| <b>Anterior Mass (% Body Mass)</b>         | <b>0.02 <math>\pm</math> 0.00</b>  | <b>0.10 <math>\pm</math> 0.01</b>  | <b>&lt;0.0001</b> |
| <b>Ventral Mass (% Body Mass)</b>          | <b>0.01 <math>\pm</math> 0.00</b>  | <b>0.05 <math>\pm</math> 0.01</b>  | <b>&lt;0.0001</b> |
| <b>Dorsal Mass (% Body Mass)</b>           | <b>0.01 <math>\pm</math> 0.00</b>  | <b>0.04 <math>\pm</math> 0.00</b>  | <b>&lt;0.0001</b> |
| <b>Lateral Mass (% Body Mass)</b>          | <b>0.00 <math>\pm</math> 0.00</b>  | <b>0.02 <math>\pm</math> 0.00</b>  | <b>0.0009</b>     |
| <b>Seminal Vesicle Mass (% Body Mass)</b>  | <b>0.04 <math>\pm</math> 0.00</b>  | <b>0.35 <math>\pm</math> 0.07</b>  | <b>&lt;0.0001</b> |
| <b>Void Spot Assay</b>                     |                                    |                                    |                   |
|                                            | <b>Castrate Male<br/>(n = 11)</b>  | <b>Castrate w/ T<br/>(n = 4)</b>   | <b>p-value</b>    |
| Count                                      | 42.00 $\pm$ 6.10                   | 50.30 $\pm$ 14.90                  | 0.5462            |
| Total Area (cm <sup>2</sup> )              | 20.50 $\pm$ 2.31                   | 22.60 $\pm$ 8.62                   | 0.7419            |
| Percent area in center                     | 2.34 $\pm$ 0.666                   | 7.35 $\pm$ 5.93                    | 0.8645            |
| Percent area in corners                    | 77.40 $\pm$ 3.96                   | 72.80 $\pm$ 15.30                  | 0.6846            |
| Spots of a certain size (area)             |                                    |                                    |                   |
| 0 - 0.1 cm <sup>2</sup>                    | 38.10 $\pm$ 5.84                   | 44.00 $\pm$ 13.20                  | 0.6410            |
| 0.1 - 0.25 cm <sup>2</sup>                 | 1.36 $\pm$ 0.43                    | 2.00 $\pm$ 0.82                    | 0.5509            |
| 0.25 - 0.5 cm <sup>2</sup>                 | 0.64 $\pm$ 0.15                    | 1.00 $\pm$ 1.00                    | 0.5692            |
| 0.5 - 1 cm <sup>2</sup>                    | 0.46 $\pm$ 0.21                    | 0 $\pm$ 0                          | 0.3956            |
| 1 - 2 cm <sup>2</sup>                      | 0.18 $\pm$ 0.12                    | 0.25 $\pm$ 0.25                    | >0.9999           |
| 2 - 3 cm <sup>2</sup>                      | 0 $\pm$ 0                          | 0.50 $\pm$ 0.50                    | 0.2667            |
| 3 - 4 cm <sup>2</sup>                      | 0 $\pm$ 0                          | 0 $\pm$ 0                          | >0.9999           |
| 4+ cm <sup>2</sup>                         | 1.27 $\pm$ 0.14                    | 2.50 $\pm$ 0.87                    | 0.1692            |
| <b>Cystometry</b>                          |                                    |                                    |                   |
|                                            | <b>Castrate Male<br/>(n = 7-8)</b> | <b>Castrate w/ T<br/>(n = 8)</b>   | <b>p-value</b>    |
| Void Duration                              | 0.42 $\pm$ 0.03                    | 0.51 $\pm$ 0.04                    | 0.1049            |
| Intervoid Interval                         | 2.77 $\pm$ 0.12                    | 3.00 $\pm$ 0.45                    | 0.6444            |
| Baseline Pressure                          | 2.21 $\pm$ 0.26                    | 2.92 $\pm$ 0.61                    | 0.3111            |
| Normalized Threshold Pressure              | 4.75 $\pm$ 0.73                    | 3.32 $\pm$ 0.58                    | 0.1437            |
| Normalized Peak Void Pressure              | 17.20 $\pm$ 0.75                   | 16.00 $\pm$ 1.70                   | 0.5400            |
| <b>Non-voiding contractions</b>            | <b>1.46 <math>\pm</math> 0.25</b>  | <b>3.58 <math>\pm</math> 0.56</b>  | <b>0.0039</b>     |
| Voided Volume ( x 10 <sup>-2</sup> )       | 4.05 $\pm$ 0.11                    | 4.60 $\pm$ 0.64                    | 0.4184            |
| Compliance ( x 10 <sup>-2</sup> )          | 0.89 $\pm$ 0.20                    | 1.34 $\pm$ 0.31                    | 0.1840            |
| Volume Flow Rate ( x 10 <sup>-3</sup> )    | 1.69 $\pm$ 0.16                    | 1.53 $\pm$ 0.18                    | 0.5159            |
| Mass Based Flow Rate                       | 23.40 $\pm$ 3.17                   | 20.60 $\pm$ 4.57                   | 0.6126            |
| Efficiency (%)                             | 96.80 $\pm$ 3.31                   | 90.74 $\pm$ 5.81                   | 0.3993            |
